# Supplementary material
Source: PubMed Central journal article supplement (PMC2785442)

Supporting Information (Part A) for

**Allenyl Azide Cycloaddition Chemistry. Exploration of the Scope and Mechanism  
of Cyclopentennelated Dihydropyrrole Synthesis through Azatrimethylenemethane  
(ATMM) Intermediates.**

*Ken S. Feldman,<sup>\*†</sup> Malliga R. Iyer,<sup>†</sup> Carlos Silva López,<sup>§</sup> and Olalla Nieto Faza<sup>§</sup>*

Department of Chemistry, The Pennsylvania State University, University Park,  
Pennsylvania 16802, USA, Departamento de Química Orgánica, Universidade de Vigo,  
Lagoas Marcosende, 36200, Vigo, Galicia, Spain, and Department of Chemistry,  
University of Minnesota, 207 Pleasant St. SE, Minneapolis, Minnesota 55455-0431, USA

|                                |     |
|--------------------------------|-----|
| General Experimental           | S2  |
| <b>19</b> <sup>1</sup> H NMR   | S3  |
| <b>19</b> <sup>13</sup> C NMR  | S4  |
| <b>20a</b> <sup>1</sup> H NMR  | S5  |
| <b>20a</b> <sup>13</sup> C NMR | S6  |
| <b>20b</b> <sup>1</sup> H NMR  | S7  |
| <b>20b</b> <sup>13</sup> C NMR | S8  |
| <b>20c</b> <sup>1</sup> H NMR  | S9  |
| <b>20c</b> <sup>13</sup> C NMR | S10 |
| <b>20d</b> <sup>1</sup> H NMR  | S11 |
| <b>20d</b> <sup>13</sup> C NMR | S12 |
| <b>20e</b> <sup>1</sup> H NMR  | S13 |
| <b>20e</b> <sup>13</sup> C NMR | S14 |
| <b>23a</b> <sup>1</sup> H NMR  | S15 |
| <b>23a</b> <sup>13</sup> C NMR | S16 |
| <b>23b</b> <sup>1</sup> H NMR  | S17 |
| <b>23b</b> <sup>13</sup> C NMR | S18 |
| <b>23c</b> <sup>1</sup> H NMR  | S19 |
| <b>23c</b> <sup>13</sup> C NMR | S20 |
| <b>23d</b> <sup>1</sup> H NMR  | S21 |
| <b>23d</b> <sup>13</sup> C NMR | S22 |

**General Experimental.** Moisture and oxygen sensitive reactions were carried out in flame-dried glassware under an argon or nitrogen atmosphere. Tetrahydrofuran (THF) was distilled from sodium benzophenone ketyl under an argon atmosphere, or passed through an activated alumina column, immediately before use. Dichloromethane ( $\text{CH}_2\text{Cl}_2$ ) was distilled from calcium hydride ( $\text{CaH}_2$ ) under an argon atmosphere, or passed through an activated alumina column, immediately before use. All organic reagents were used as purchased. Purification of products via flash chromatography was performed with 32-63  $\mu\text{m}$  silica gel and the solvent systems indicated. Hexanes, EtOAc and  $\text{Et}_2\text{O}$  used in flash chromatography were distilled from  $\text{CaH}_2$ , or passed through an activated alumina column, prior to use. Melting points are uncorrected. Low- and high-resolution mass spectra were obtained according to the specified technique and were performed at the Pennsylvania State University, University Park, PA. Copies of  $^1\text{H}$  and  $^{13}\text{C}$  NMR spectra are supplied in the Supporting Information as criteria of purity.

Current Data Parameters  
 NAME MRI-Aug11-04  
 EXPNO 1  
 PROCNO 1

F2 - Acquisition Parameters  
 Date\_ 20040811  
 Time 14.06  
 INSTRUM SPECT  
 PROBN0 5 mm BBI 1H-6  
 PULPROG zg30  
 TO 65536  
 SOLVENT CDCl3  
 NS 11  
 DS 2  
 SWH 8278.146 Hz  
 FIDRES 0.126314 Hz  
 AQ 3.9584243 sec  
 RG 25.4  
 CW 60.400 usec  
 DE 6.00 usec  
 TE 300.0 K  
 D1 1.0000000 sec

===== CHANNEL f1 =====  
 NUC1 1H  
 P1 6.45 usec  
 PL1 0.00 dB  
 SF01 400.1324710 MHz

F2 - Processing parameters  
 SI 32768  
 SF 400.1300000 MHz  
 WDW nc  
 SSB 0  
 LB 0.00 Hz  
 GB 0  
 PC 1.00

1D NMR plot parameters  
 CX 20.00 cm  
 FIP 10.000 ppm  
 F1 4001.30 Hz  
 F2P -1.000 ppm  
 F2 -400.13 Hz  
 PPMCK 0.55000 ppm/cm  
 HZCM 220.07150 Hz/cm

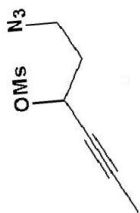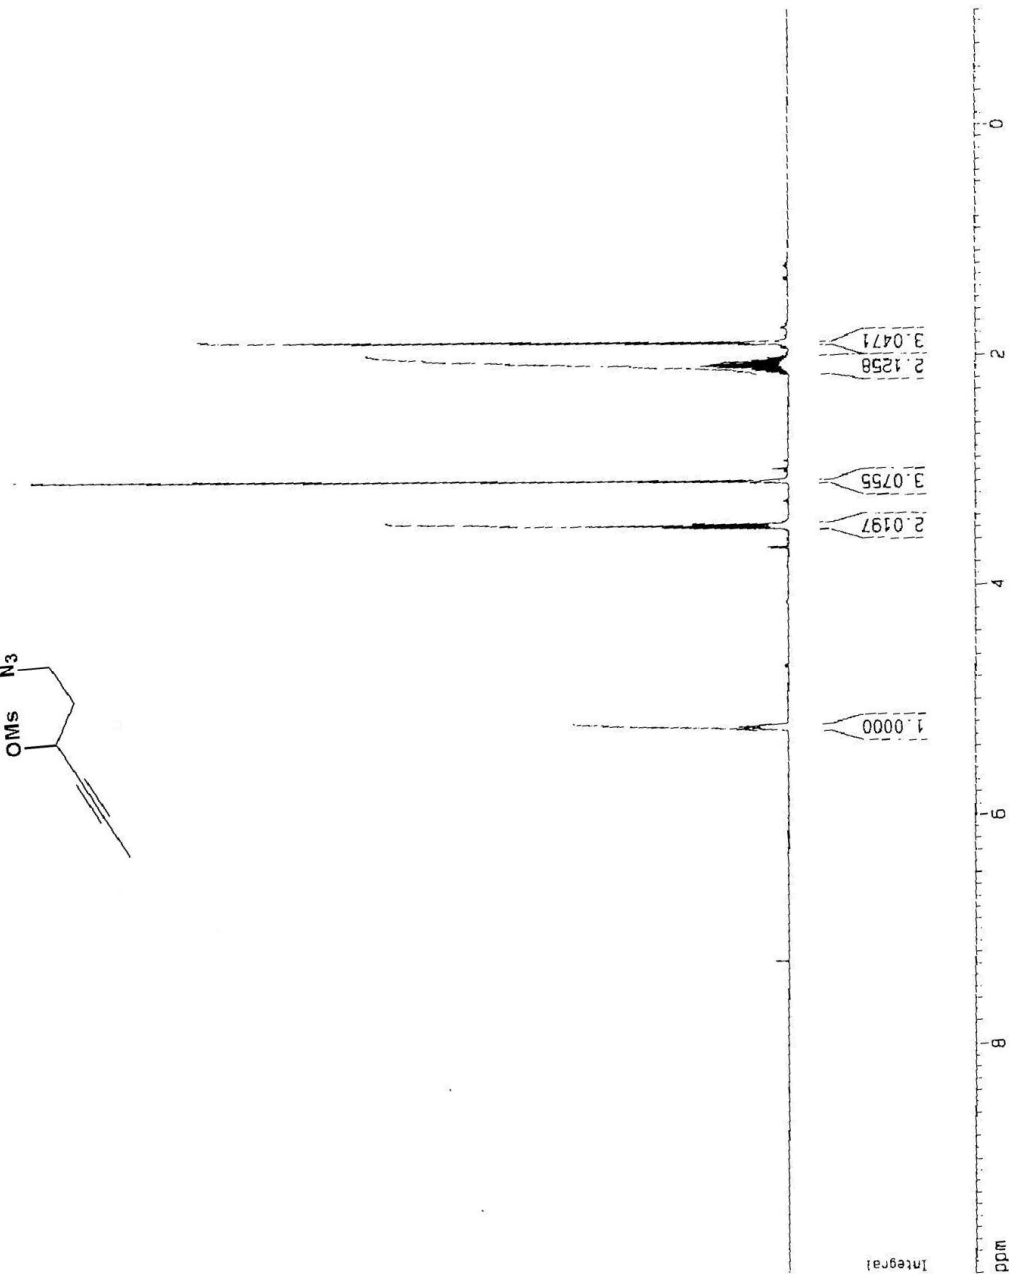

```

Current Data Parameters
NAME      M11-Aug11-04
EXPNO    2
PROCNO   1

F2 - Acquisition Parameters
Date_    20040811
Time     14.18
INSTRUM spect
PROBHD   5 mm BBI 1H-B
PULPROG zgpg30
TD       65536
SOLVENT CDC13
NS       161
DS       4
SWH      25125.629 Hz
FIDRES   0.383397 Hz
AQ       1.3042164 sec
RG       4096
DM       19.900 usec
DE       6.00 usec
TE       300.0 K
D1       2.0000000 sec
d11      0.0300000 sec
d12      0.0000200 sec

***** CHANNEL f1 *****
NUC1     13C
P1       16.35 usec
PL1     -6.00 dB
SFO1    100.6237959 MHz

***** CHANNEL f2 *****
CPDPRG2 waltz16
NUC2     1H
PCPD2    14.00 usec
PL2     0.00 dB
PL12    24.00 dB
PL13    24.00 dB
SFO2    400.1316005 MHz

F2 - Processing parameters
SI       32768
SF       100.617290 MHz
WDW      EM
SSB      0
LB       1.00 Hz
GB       0
PC       1.40

CX       20.00 cm
F1P      220.000 ppm
F1       22134.80 Hz
F2P      -20.000 ppm
F2       -2012.25 Hz
PMPCM    42.00000 ppm/cm
HZCM     1207.35276 Hz/cm
    
```

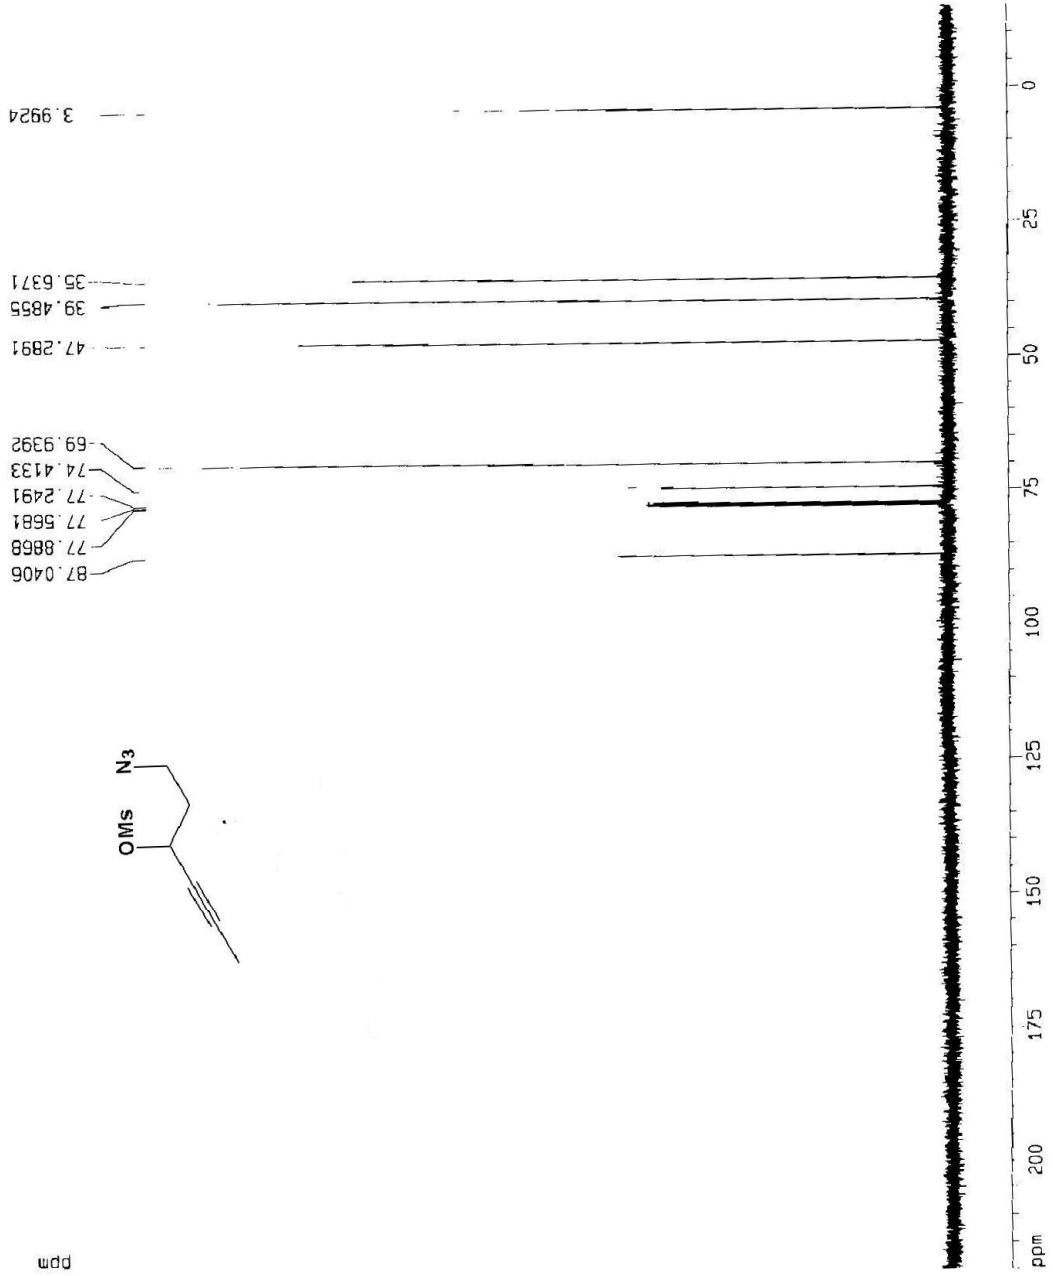

```

Current Data Parameters
NAME      MRI-Aug13-04
EXPNO    4
PROCNO   1

F2 - Acquisition Parameters
Date_    20040813
Time     15.12
INSTRUM spect
PROBHD   5 mm BBI 1H-B
PULPROG zg30
TD       65536
SOLVENT  CDCl3
NS       16
DS       2
SWH      8278.145 Hz
FIDRES   0.126314 Hz
AQ       3.9584243 sec
RG       228.1
DM       60.400 usec
DE       6.00 usec
TE       300.0 K
J1       1.00000000 sec

***** CHANNEL f1 *****
NUC1     1H
P1       6.45 usec
PL1     0.00 dB
SFO1    400.1324710 MHz

F2 - Processing parameters
SI       32768
SF      400.1300000 MHz
WDW      NO
SSB      0
LB       0.00 Hz
GB       0
PC       1.00

1D NMR plot parameters
CX       20.00 cm
F1P     10.000 ppm
F1      4001.30 Hz
F2P     -1.000 ppm
F2      -400.13 Hz
PRMCM   0.55000 ppm/cm
-TCM    220.07150 Hz/cm
    
```

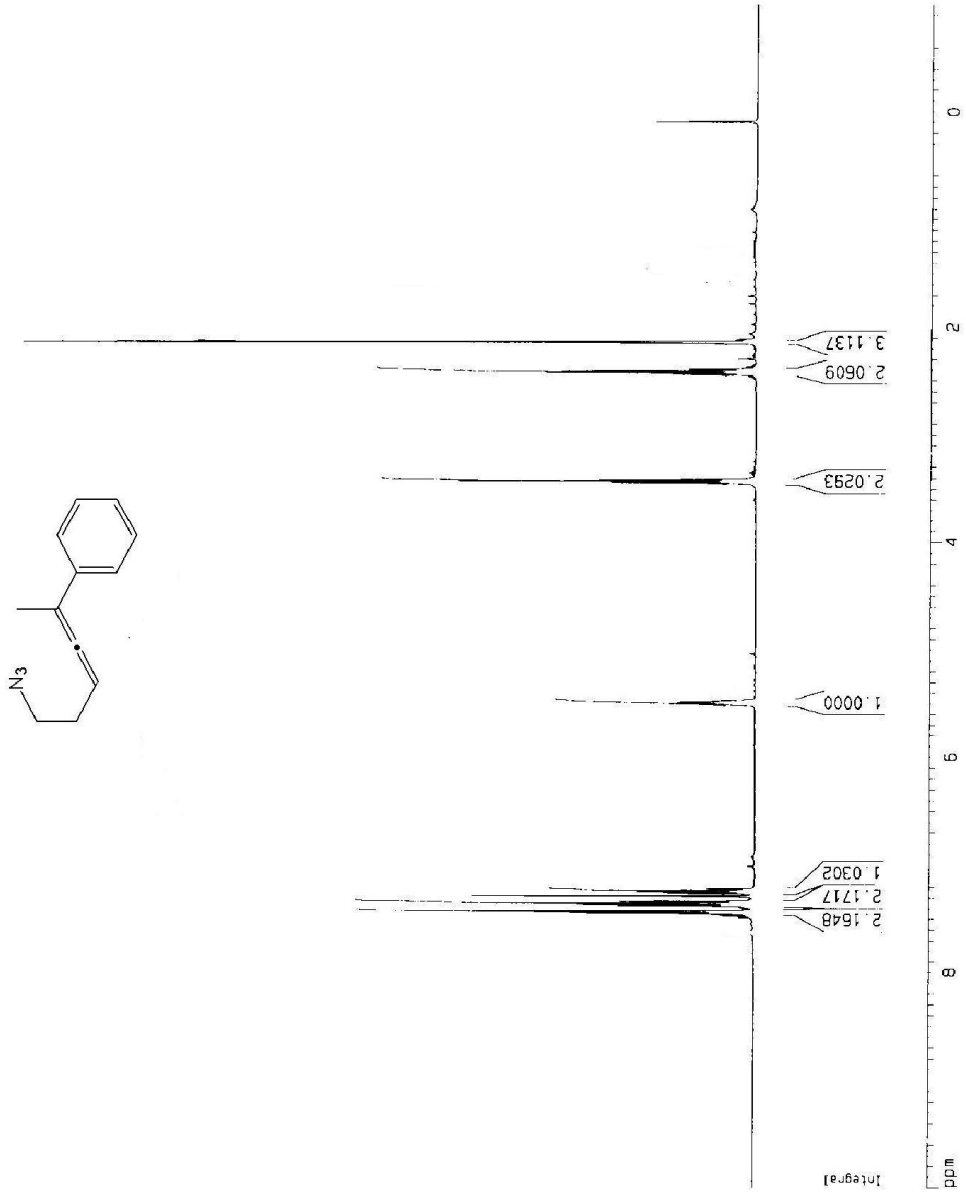

```

Current Data Parameters
NAME      MRI-Aug15-04
EXPNO    1
PROCNO   1

F2 - Acquisition Parameters
Date_    20040815
Time     18.28
INSTRUM  spect
PROBHD   5 mm QNP 1H/1
PULPROG  zgpg30
TD        65536
SOLVENT  CDCl3
NS        151
DS        4
SWH       18756.892 Hz
FIDRES    0.286819 Hz
AQ        1.7433076 sec
RG         4096
DM        26.600 usec
DE         6.00 usec
TE        300.0 K
SI        2.0000000 sec
D11       0.0300000 sec
D12       0.0002000 sec

***** CHANNEL f1 *****
NUC1      13C
P1        5.40 usec
PL1       -6.00 dB
SFO1      75.4106357 MHz

***** CHANNEL f2 *****
CPDPRG2  waltz16
NUC2      1H
PCPD02    115.00 usec
PL2        0.00 dB
PL12      20.00 dB
PL13      20.00 dB
SFO2      299.8711995 MHz

F2 - Processing parameters
SI        32768
SF        75.4023410 MHz
WDW       EM
SSB       0
LB        1.00 Hz
GB        0
PC        1.40

1D NMR Plot parameters
CA        20.00 cm
F1P       220.000 ppm
F1        16588.52 Hz
F2P       -20.000 ppm
F2        -1508.05 Hz
PPMCM     12.00000 ppm/cm
HZCM      904.82812 Hz/cm
    
```

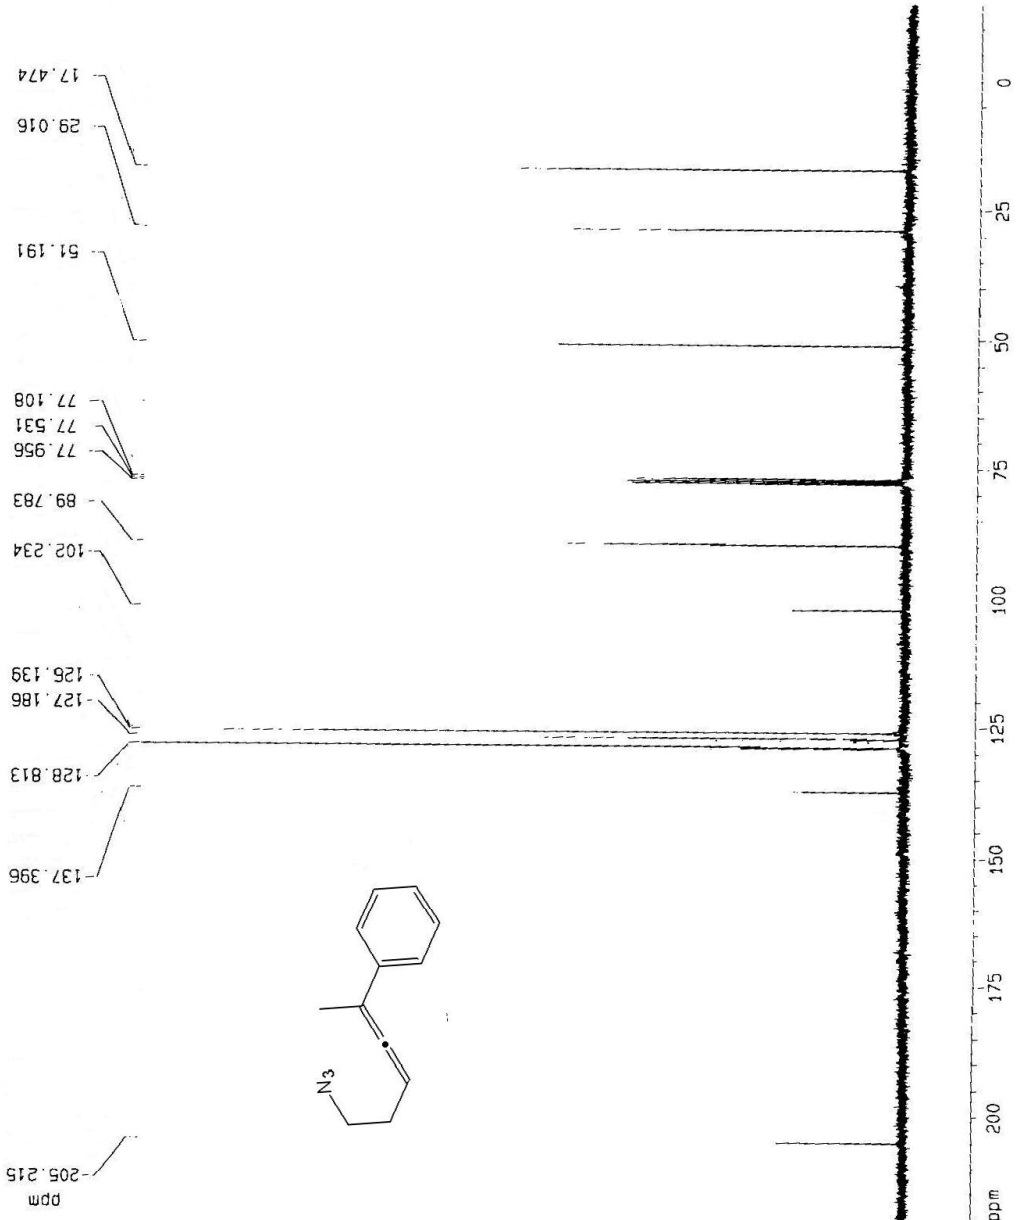

Current Data Parameters  
 NAME MRI-Jun21-04  
 EXPNO 3  
 PROCNO 1

F2 - Acquisition Parameters  
 Date\_ 20040621  
 Time 14:16  
 INSTRUM spect  
 PROBHD 5 mm Multinu  
 PULPROG zg30  
 TD 65536  
 SOLVENT CDCl3  
 NS 16  
 DS 2  
 SWH 6172.839 Hz  
 FIDRES 0.094190 Hz  
 AQ 5.3084660 sec  
 RG 456.1  
 DW 81.000 usec  
 DE 6.00 usec  
 TE 300.0 K  
 D1 1.0000000 sec

===== CHANNEL f1 =====  
 NUC1 1H  
 P1 9.80 usec  
 PL1 -6.00 dB  
 SFC1 300.1318534 MHz

F2 - Processing parameters  
 SI 32768  
 SF 300.1300000 MHz  
 WDM no  
 SSB 0  
 LB 0.00 Hz  
 GB 0  
 PC 1.00

1D NMR plot parameters  
 CX 20.00 cm  
 F1P 10.000 ppm  
 F1 3001.30 Hz  
 F2P -1.000 ppm  
 F2 -300.13 Hz  
 PPMCM 0.55000 ppm/cm  
 HZCM 165.07149 Hz/cm

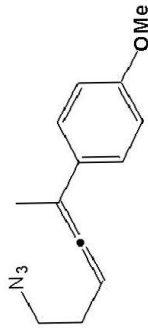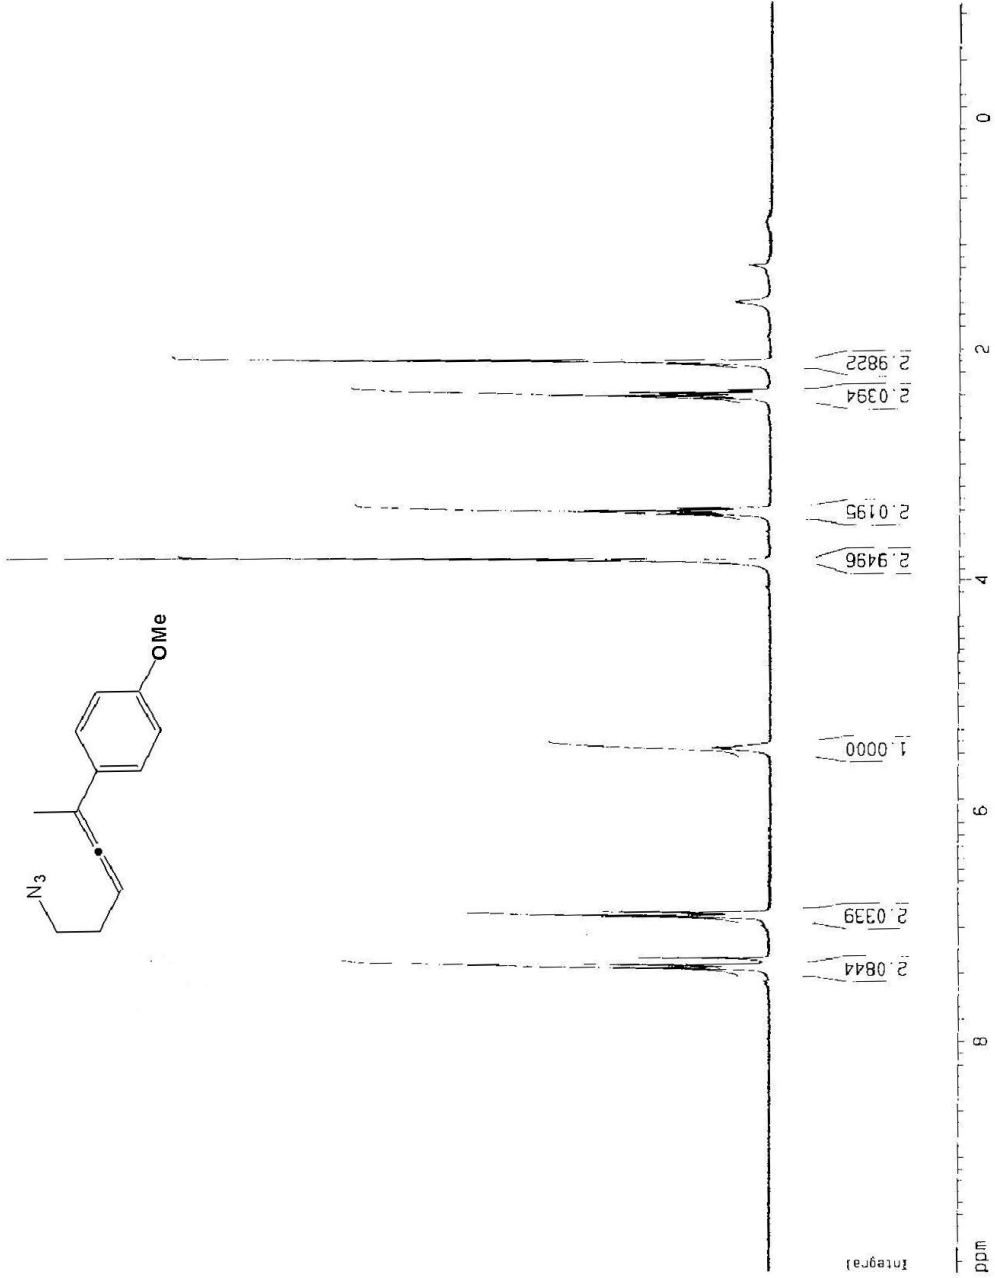

Current Data Parameters  
 NAME MRI-Jun21-04  
 EXPNO 6  
 PROCNO :

F2 - Acquisition Parameters  
 Date\_ 20040622  
 Time 8.02  
 INSTRUM spect  
 PROBHD 5 mm Multinu  
 PULPROG zgpg30  
 SOLVENT CDCl3  
 NS 12000  
 DS 4  
 SWH 18832.393 Hz  
 FIDRES 0.267360 Hz  
 AQ 1.7400308 sec  
 RG 6192  
 DK 26.550 usec  
 DE 5.00 usec  
 TE 300.0 K  
 D1 2.0000000 sec  
 D11 0.0300000 sec  
 D12 0.0002000 sec

===== CHANNEL f1 =====  
 NUC1 13C  
 P1 5.60 usec  
 PL1 -6.00 dB  
 SF01 75.4760200 MHz

===== CHANNEL f2 =====  
 CPDPRG2 waltz16  
 NUC2 1H  
 PCPD2 114.00 usec  
 PL2 -6.00 dB  
 PL12 18.00 dB  
 PL13 18.00 dB  
 SF02 300.1312095 MHz

F2 - Processing parameters  
 SI 32768  
 SF 75.4677190 MHz  
 MDW EM  
 SSB 0  
 LB 1.00 Hz  
 GB 0  
 PC 1.40

1D NMR plot parameters  
 CX 20.00 cm  
 F1P 220.000 ppm  
 F1 16602.90 Hz  
 F2P -20.000 ppm  
 F2 -1509.35 Hz  
 PPMCM :2.00000 ppm/cm  
 HZCM 905.61267 Hz/cm

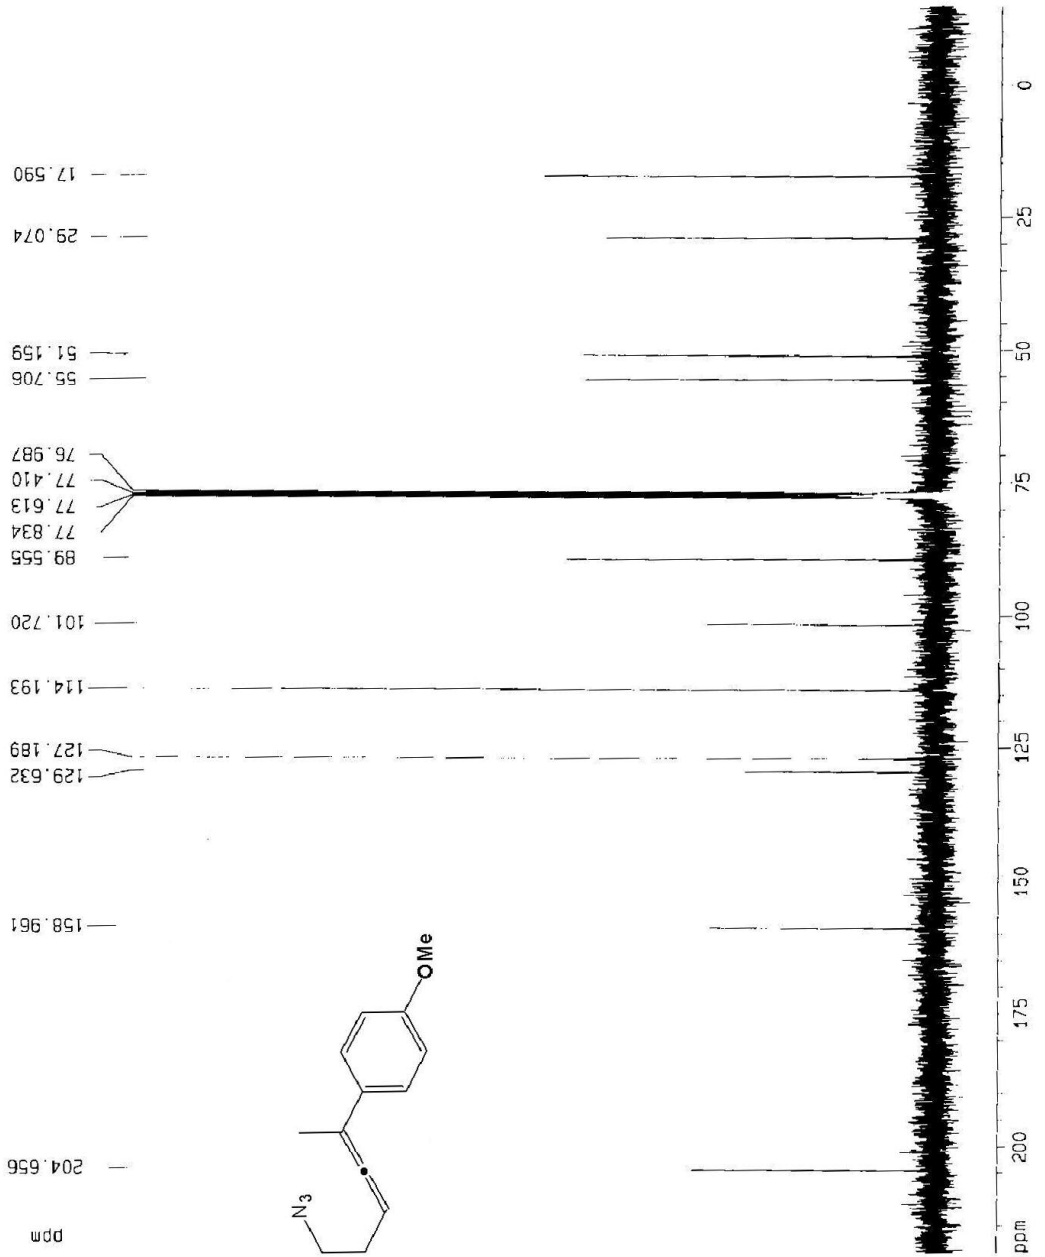



Current Data Parameters  
 NAME MRI-AUG20-04  
 EXPNO 2  
 PROCNO 1

F2 - Acquisition Parameters  
 Date\_ 20040820  
 Time 9.26  
 INSTRUM spect  
 PROBHD 5 mm QNP 1H  
 PULPROG zg30  
 TD 65536  
 SOLVENT CDCl3  
 NS 16  
 DS 2  
 SWH 7462.687 Hz  
 FIDRES 0.113872 Hz  
 AQ 4.3509621 sec  
 RG 256  
 CW 67.000 usec  
 DE 95.71 usec  
 TE 300.0 K  
 -L1 0 dB  
 O1 1.0000000 sec  
 P1 12.00 usec  
 SF01 360.1361620 MHz  
 NUCLEUS 1H

F2 - Processing parameters  
 SI 32768  
 SF 360.1340131 MHz  
 WDM no  
 SSB 0  
 -B 0.00 Hz  
 GB 0  
 PC 1.00

1D NMR plot parameters  
 CX 20.00 cm  
 F1P 10.000 ppm  
 F1 3601.34 Hz  
 F2P -1.000 ppm  
 F2 -360.13 Hz  
 -PMCH 0.55000 ppm/cm  
 -ZCM 198.07372 Hz/cm

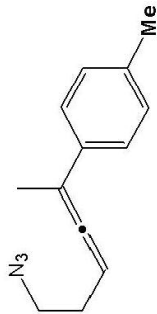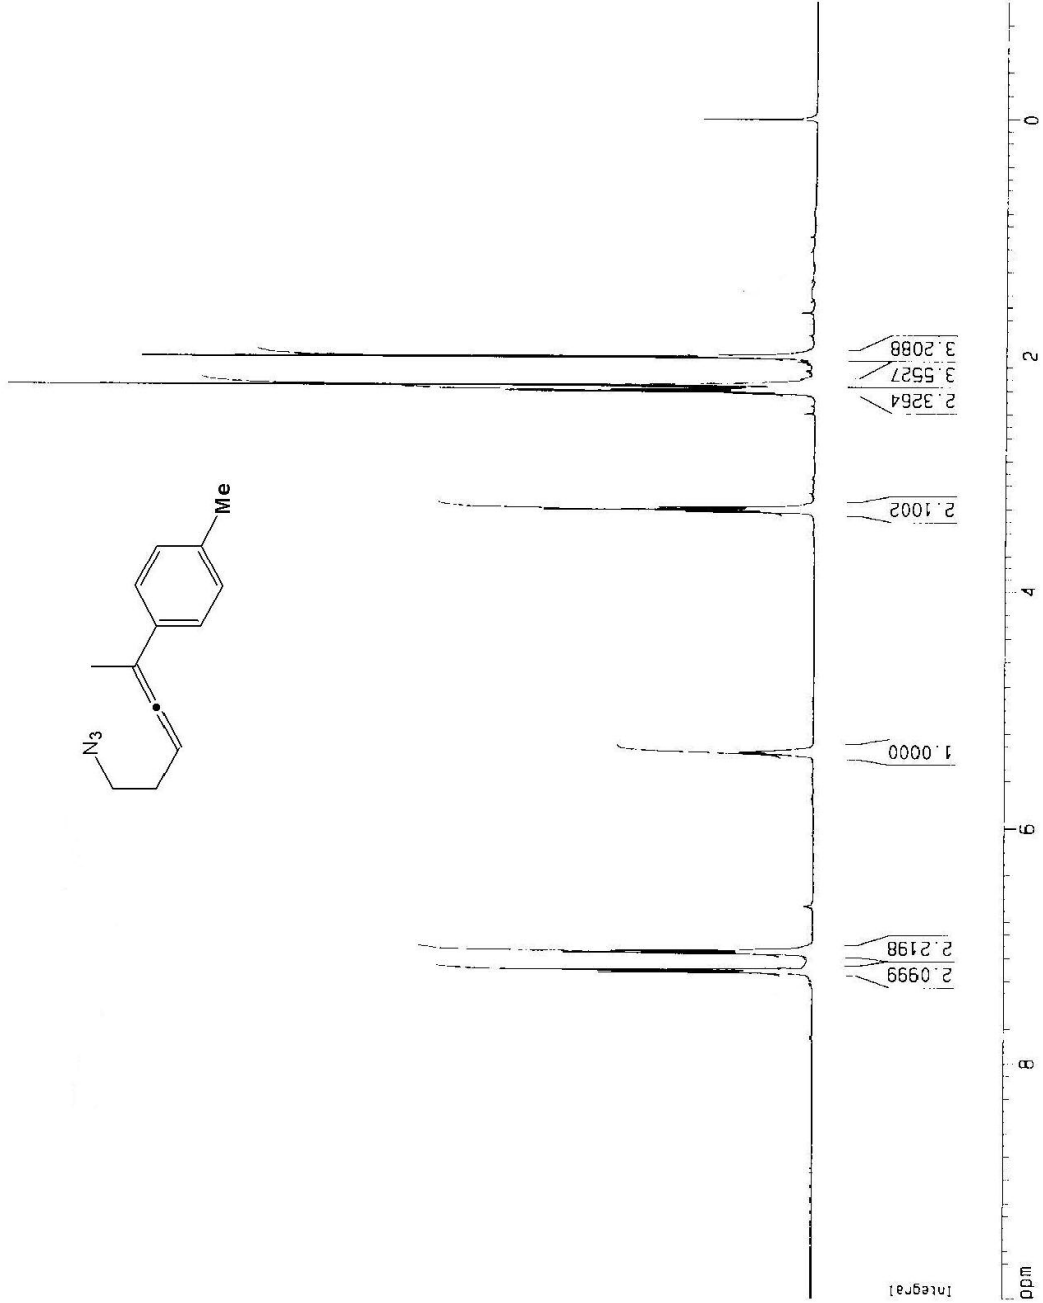

20c

Current Data Parameters  
NAME MRI-AUG20-04  
EXPNO 3  
PROCNO 1

F2 - Acquisition Parameters  
Date\_ 20040820  
Time 9.40  
INSTRUM spect  
PROBHD 5 mm QNP 1H  
PULPROG zgpg30  
TD 65536  
SOLVENT CDCl3  
NS 156  
DS 4  
SWH 28727.273 Hz  
FIDRES 0.346791 Hz  
AQ 1.4418420 sec  
RG 32768  
DM 22.900 usec  
DE 31.43 usec  
TE 300.0 K  
H1 0 dB  
J1 2.00000000 sec  
CPDPRG waltz16  
P31 106.00 usec  
S4 30 dB  
D11 0.03000000 sec  
p1 30 dB  
S2 30 dB  
p1 7.90 usec  
SF01 90.5658968 MHz  
NUCLEUS 13C

F2 - Processing parameters  
SI 32768  
SF 80.5657235 MHz  
WDW EM  
SSB 0  
-B 1.00 Hz  
GB 0  
PC 1.40

1D NMR plot parameters  
CX 20.00 cm  
F1P 230.000 ppm  
F1 20827.82 Hz  
F2P -20.000 ppm  
F2 -1811.11 Hz  
PPMCM 12.50000 ppm/cm  
HZCM 1131.94653 Hz/cm

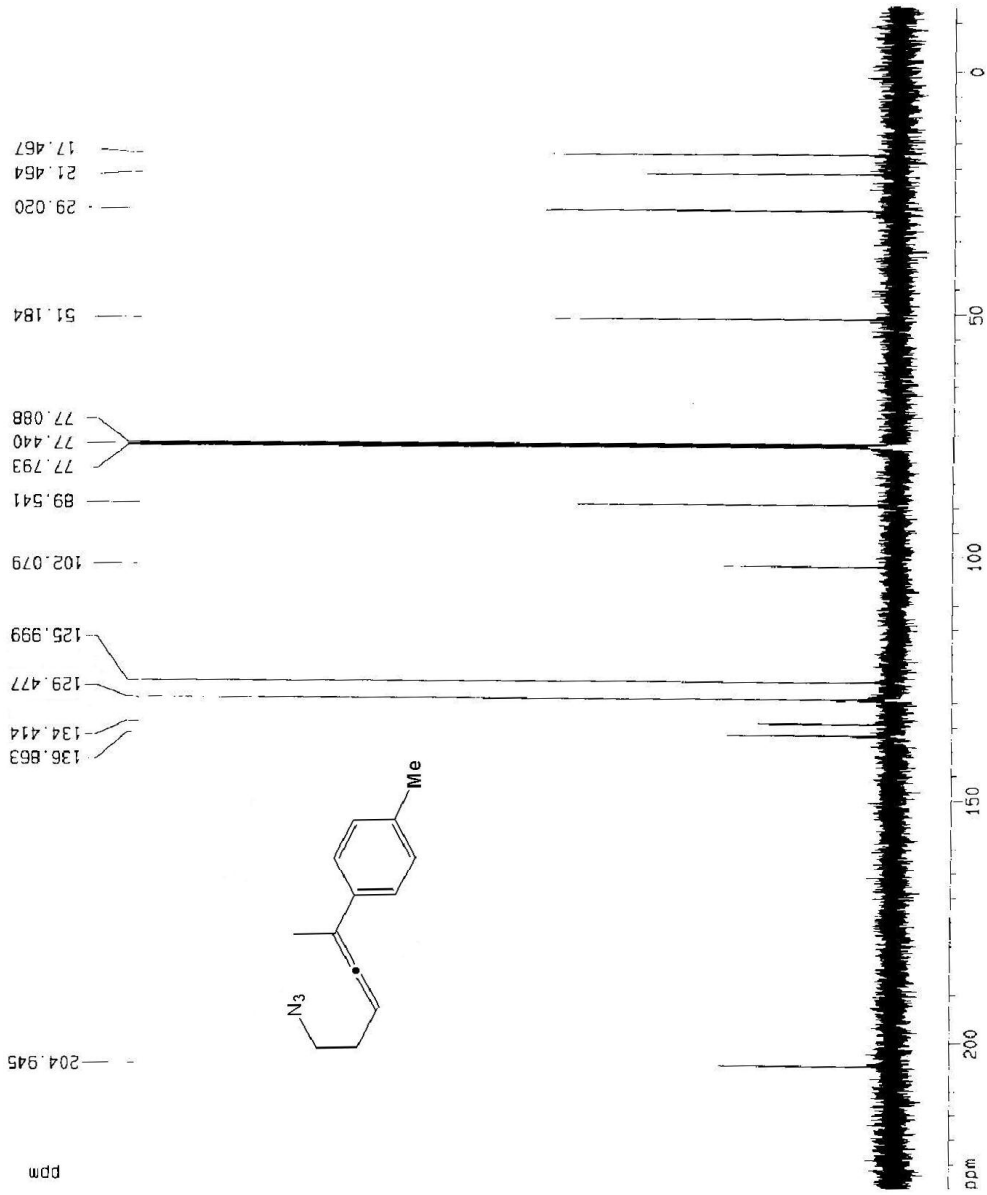

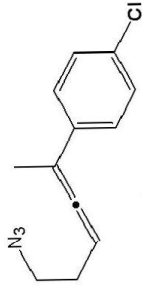

Current Data Parameters  
 NAME MRI-JUL25-04  
 EXPNO 3  
 PROCNO 1

F2 - Acquisition Parameters  
 Date\_ 20040726  
 Time 8.54  
 INSTRUM spect  
 PROBHD 5 mm BBI JH-B  
 PULPROG zg30  
 TD 65536  
 SOLVENT CCl3  
 NS 16  
 DS 2  
 SWH 8278.146 Hz  
 FIDRES 0.126314 Hz  
 AQ 3.9584243 sec  
 RG 57  
 DM 60.400 usec  
 DE 6.00 usec  
 TE 300.0 K  
 D1 1.00000000 sec

===== CHANNEL f1 =====  
 NUCL1 1H  
 P1 6.45 usec  
 PL1 0.00 dB  
 SFO1 400.1324710 MHz

F2 - Processing parameters  
 SI 32768  
 SF 400.1300000 MHz  
 WDW no  
 SSB 0  
 LB 0.00 Hz  
 GB 0  
 PC 1.00

1D NMR plot parameters  
 CX 20.00 cm  
 F1p 10.000 ppm  
 F1 4001.30 Hz  
 F2p -1.000 ppm  
 F2 -400.13 Hz  
 ppmCM 0.55000 ppm/cm  
 HzCM 220.07150 Hz/cm

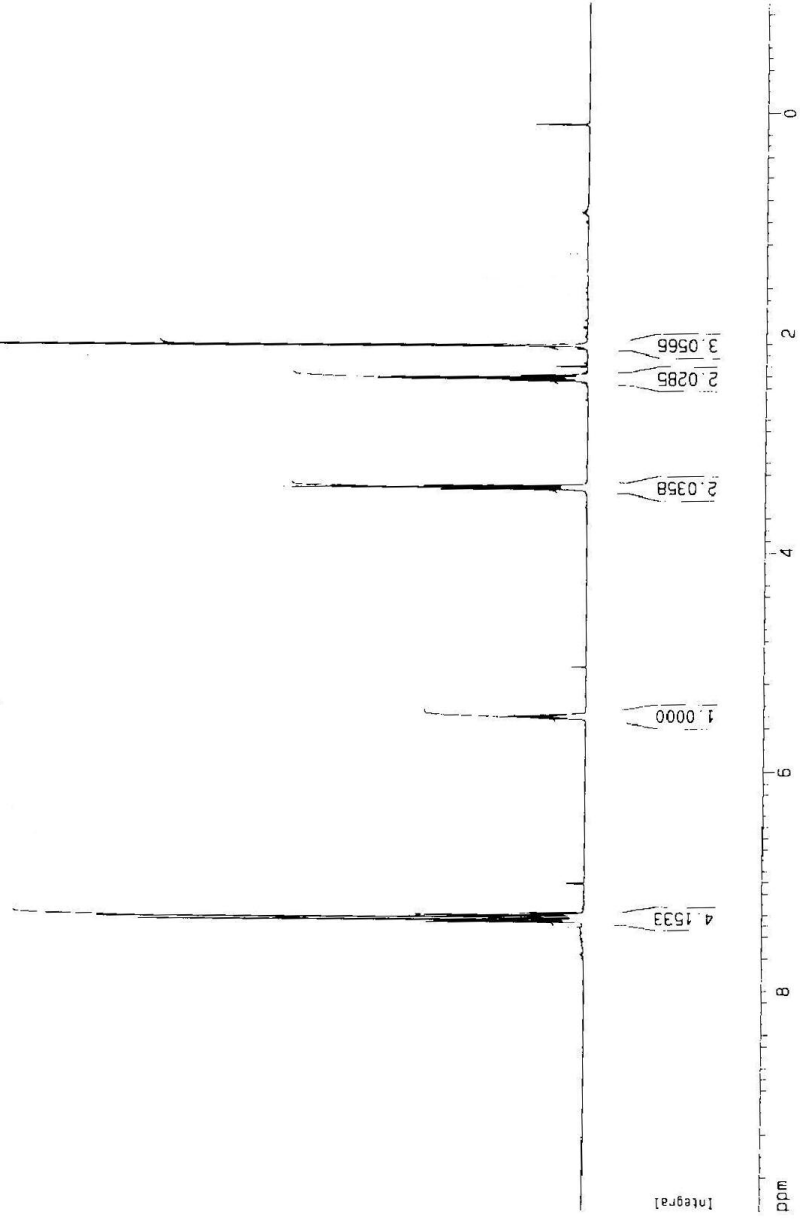

```

Current Data Parameters
NAME      MHI-Jul26-04
EXPNO    4
PROCNO   1

F2 - Acquisition Parameters
Date_    20040726
Time     9.04
INSTRUM spect
PROBHD   5 mm BBI 1H-B
PULPROG zgpg30
TD        65536
SOLVENT  CDCl3
NS        154
DS        4
SWH       25125.629 Hz
FIDRES   0.383387 Hz
AQ        1.3042164 sec
RG        16384
DM        19.900 usec
DE        6.00 usec
TE        300.0 K
D1        2.0000000 sec
d11       0.0300000 sec
d12       0.0002000 sec

===== CHANNEL f1 =====
NUC1      13C
P1        15.35 usec
PL1       -5.00 dB
SFO1      100.6237959 MHz

===== CHANNEL f2 =====
CPDPRG2  waltz16
NUC2      1H
PCPD2     114.00 usec
PL2       0.00 dB
PL12      24.00 dB
PL13      24.00 dB
SFO2      400.1316005 MHz

F2 - Processing parameters
S1        32768
SF        100.6127250 MHz
WON       EM
SSB       0
-B        1.00 Hz
GB        0
-PC       1.40

1D NMR Plot parameters
CX        20.00 cm
F1P       220.000 ppm
F1        22134.80 Hz
F2P       -20.000 ppm
F2        -2012.25 Hz
PPMCM     12.00000 ppm/cm
HZCM      1207.35278 Hz/cm
    
```

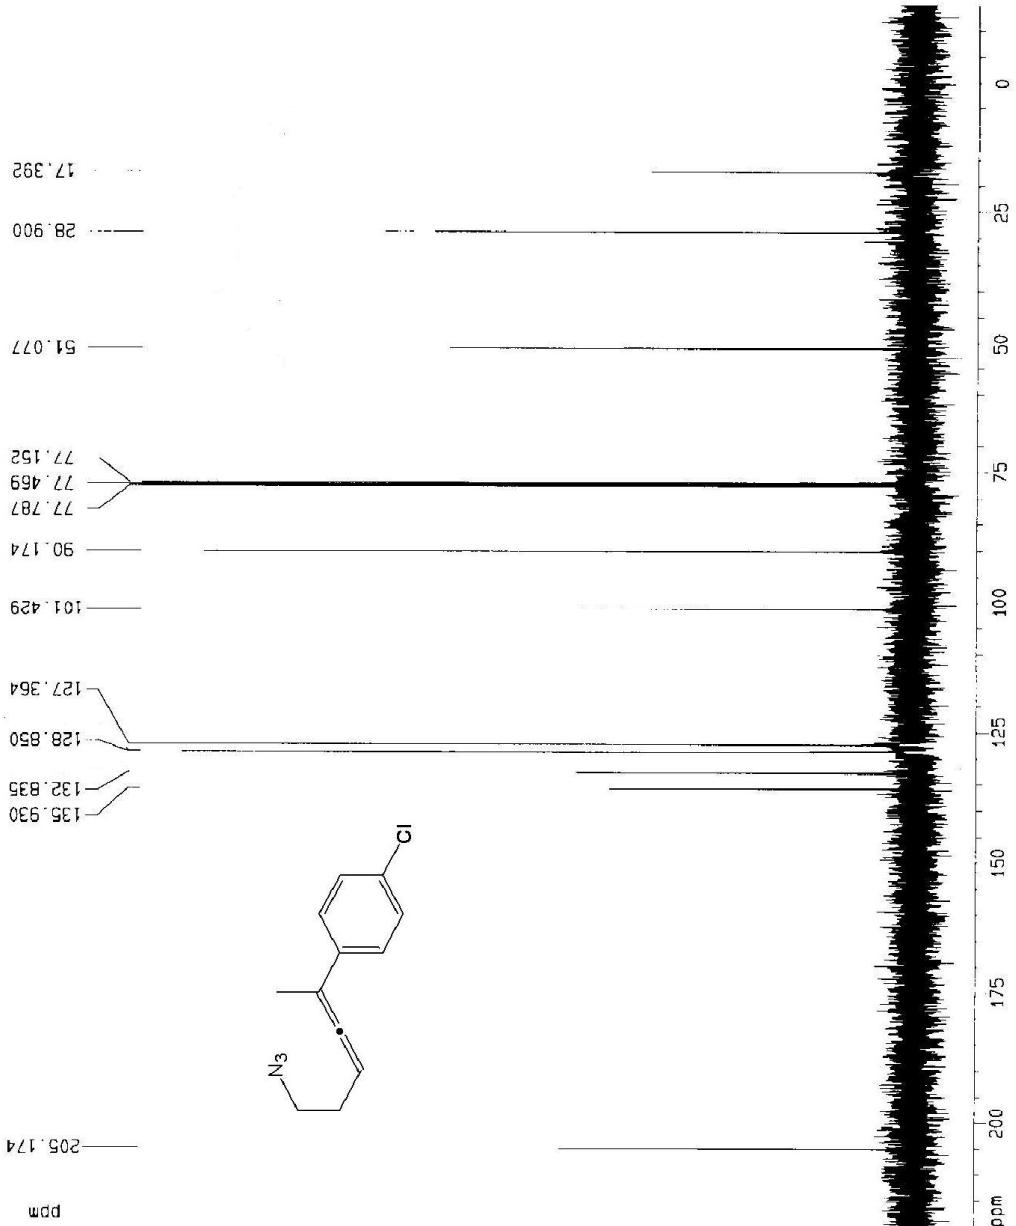

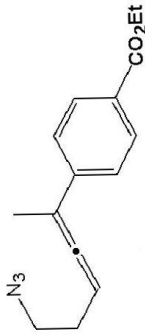

Current Data Parameters  
 NAME MRI-Aug04-04  
 EXPNO 5  
 PROCNO 1

F2 - Acquisition Parameters  
 Date\_ 20040804  
 Time 18:23  
 INSTRUM spect  
 PROBHD 5 mm BBI 1H-8  
 PULPROG zg30  
 TD 65536  
 SOLVENT CDCl3  
 NS 16  
 DS 2  
 SWH 8278.146 Hz  
 FIDRES 0.126314 Hz  
 AQ 3.9564243 sec  
 RG 203.2  
 DM 60.400 usec  
 DE 6.00 usec  
 TE 300.0 K  
 D1 1.00000000 sec

===== CHANNEL f1 =====  
 NUC1 1H  
 P1 6.45 usec  
 PL1 0.00 dB  
 SFO1 400.1324710 MHz

F2 - Processing parameters  
 SI 32768  
 SF 400.1300000 MHz  
 WDW no  
 SSB 0  
 \_B 0.00 Hz  
 GB 0  
 PC 1.00

1D NMR plot parameters  
 CX 20.00 cm  
 FIP 10.000 ppm  
 F1 4001.30 Hz  
 F2P -1.000 ppm  
 F2 -400.13 Hz  
 ppmCM 0.55000 ppm/cm  
 HzCM 220.07150 Hz/cm

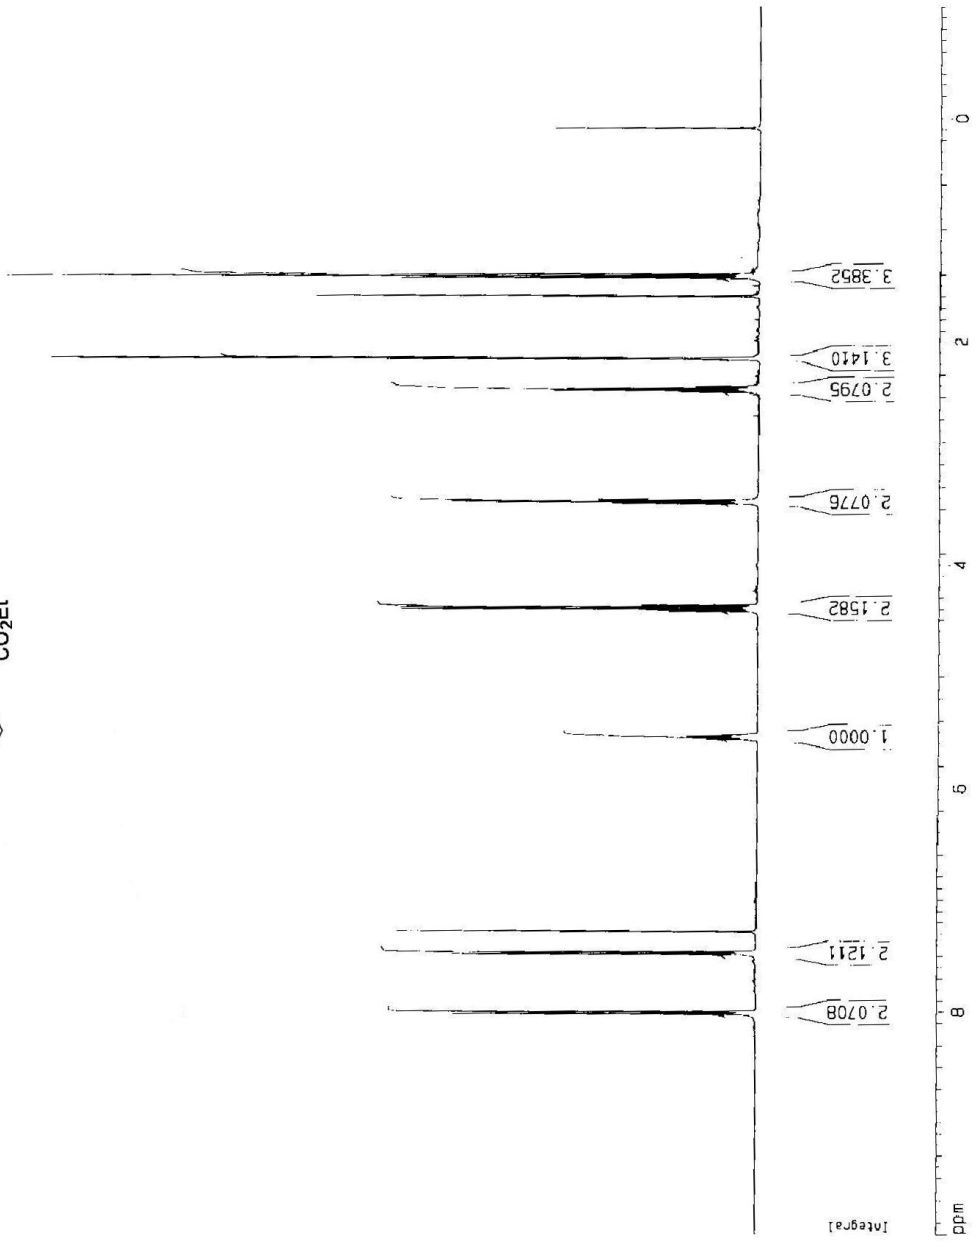

```

Current Data Parameters
NAME      MH1-Aug06-04
EXPNO    3
PROCNO   1

F2 - Acquisition Parameters
Date_    20040806
Time     18.43
INSTRUM  spect
PROBHD   5 mm BBI HX-B
PULPROG  zgpg30
TD        65536
SOLVENT  CDCl3
NS        2545
DS        4
SWH       25125.629 Hz
FIDRES    0.383387 Hz
AQ         1.3042164 sec
RG         6132
DM         19.900 usec
DE         6.00 usec
TE         300.0 K
SI         2.0000000 sec
LI         0.0300000 sec
PI2       0.0000200 sec

***** CHANNEL f1 *****
NUC1      13C
P1         16.35 usec
PL1        -6.00 dB
SFO1      100.6237559 MHz

***** CHANNEL f2 *****
CPDPRG2   waltz16
NUC2       1H
PCPD2     114.00 usec
PL2        0.00 dB
PL12      24.00 dB
PL13      24.00 dB
SFO2      400.1315005 MHz

F2 - Processing parameters
SI         32768
SF         100.6127290 MHz
WDW        EM
SSB        0
LB         1.00 Hz
GB         0
PC         1.40

1D NMR plot parameters
CX         20.00 cm
F1P        234.656 ppm
F2P        23629.72 Hz
F2         -14.868 ppm
F2         -1495.90 Hz
PPMOM      12.48631 ppm/cm
HZCM       1256.28137 Hz/cm
    
```

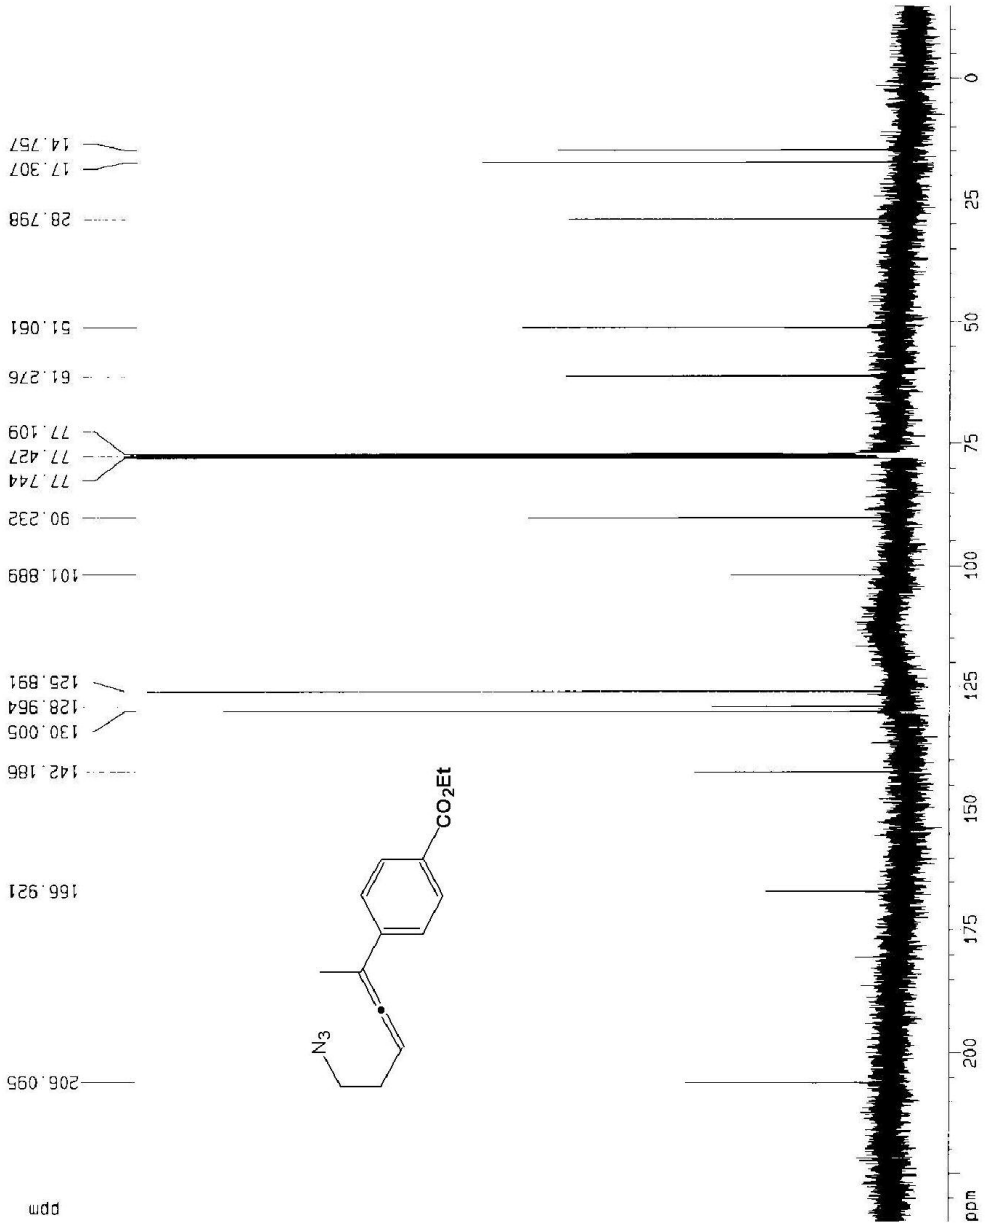

```

Current Data Parameters
NAME      MRI-APR18-04
EXPNO    1
PROCNO   1

F2 - Acquisition Parameters
Date_    20040418
Time     12.05
INSTRUM  spect
PROBHD   5 mm BBI 1H-B
PULPROG  zg30
TD        65536
SOLVENT  CDCl3
NS        16
DS        2
SWH       8278.146 Hz
FIDRES    0.126314 Hz
AQ        3.9584243 sec
RG        203.2
DM        60.400 usec
DE        6.00 usec
TE        300.0 K
D1        1.00000000 sec

===== CHANNEL f1 =====
NUC1      1H
P1        6.45 usec
PL1       0.00 dB
SF01      400.1324710 MHz

F2 - Processing parameters
SI        32768
SF        400.1300000 MHz
RG        nc
SSB       0
-B        0.00 Hz
GB        0
PC        1.00

1D NMR plot parameters
CX        20.00 cm
F1P       10.000 ppm
F1        4001.30 Hz
F2P       -1.000 ppm
F2        -400.13 Hz
PPMCM     0.55000 ppm/cm
HZCM      220.07150 Hz/cm
    
```

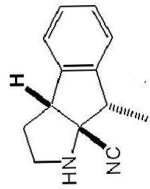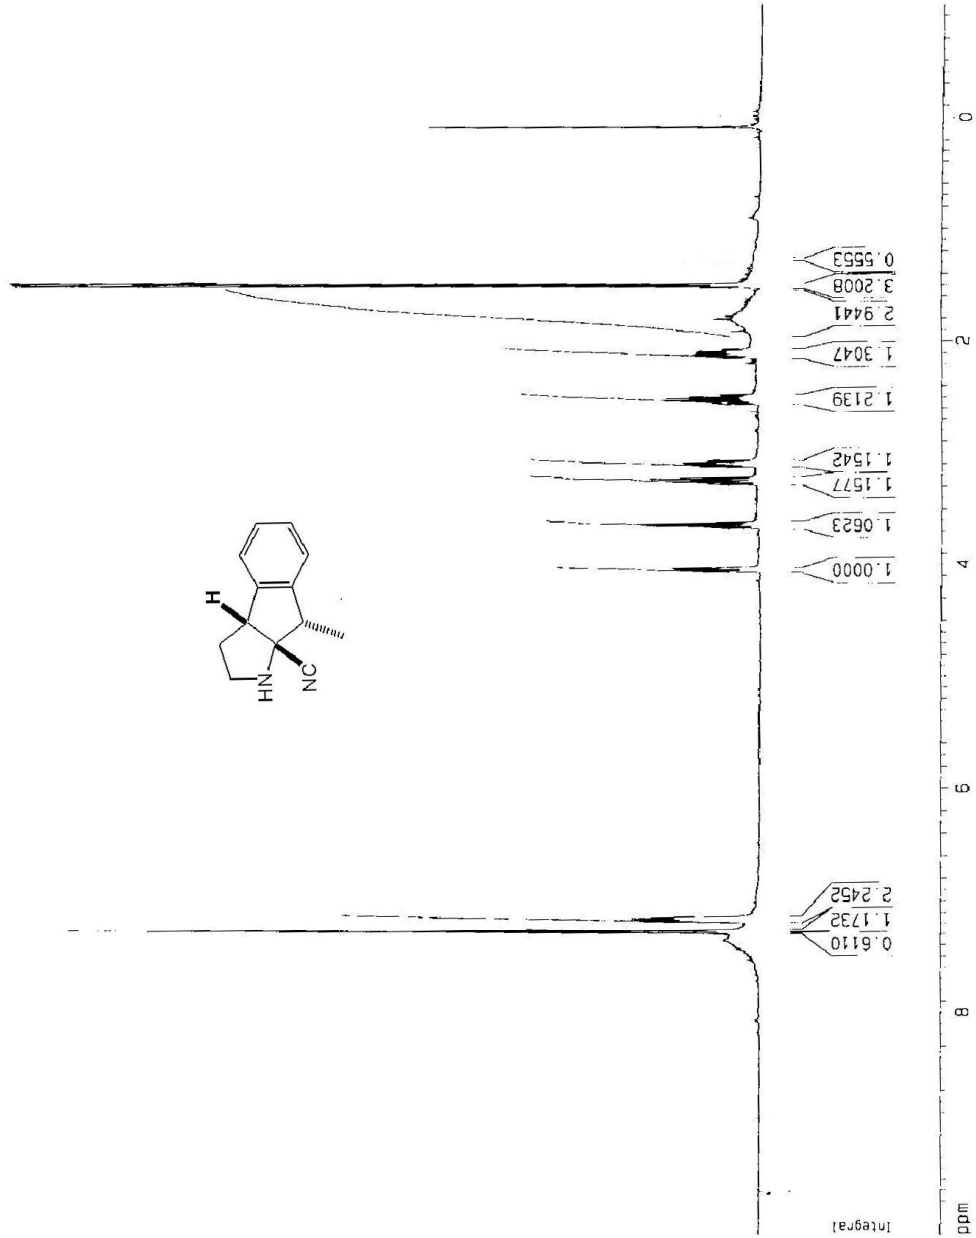

```

Current Data Parameters
NAME      MRL-APR17-04
EXPNO    2
PROCNO   1

F2 - Acquisition Parameters
Date_    20040418
Time     10.16
INSTRUM  spect
PROBHD   5 mm GNP 1H/1
PULPROG  zgpg30
TD       65536
SOLVENT  DMS-D
NS       13993
DS       4
SWH      18796.992 Hz
FIDRES   0.288819 Hz
AQ       1.7433076 sec
RG       2048
DM       26.608 usec
DE       5.00 usec
TE       300.0 K
D1       2.0000000 sec
D11      0.0300000 sec
D12      0.0000200 sec

***** CHANNEL f1 *****
NUC1     13C
P1       5.40 usec
PL1      -6.00 dB
SFO1     75.4106357 MHz

***** CHANNEL f2 *****
CPDPRG2  waltz16
NUC2     1H
PCPD2    115.00 usec
PL2      0.00 dB
PL12     20.00 dB
PL13     20.00 dB
SFO2     299.6711995 MHz

F2 - Processing parameters
SI       32768
SF       75.4023410 MHz
WDW      EM
SSB      0
LB       1.00 Hz
GB       0
PC       1.40

1D NMR plot parameters
CK       20.00 cr
F1P      234.651 ppm
F2       17693.24 Hz
F2P      -10.000 ppm
F2       -754.02 Hz
ppmMCH  12.23255 ppm/cm
-1ZCM   922.36328 Hz/cm
    
```

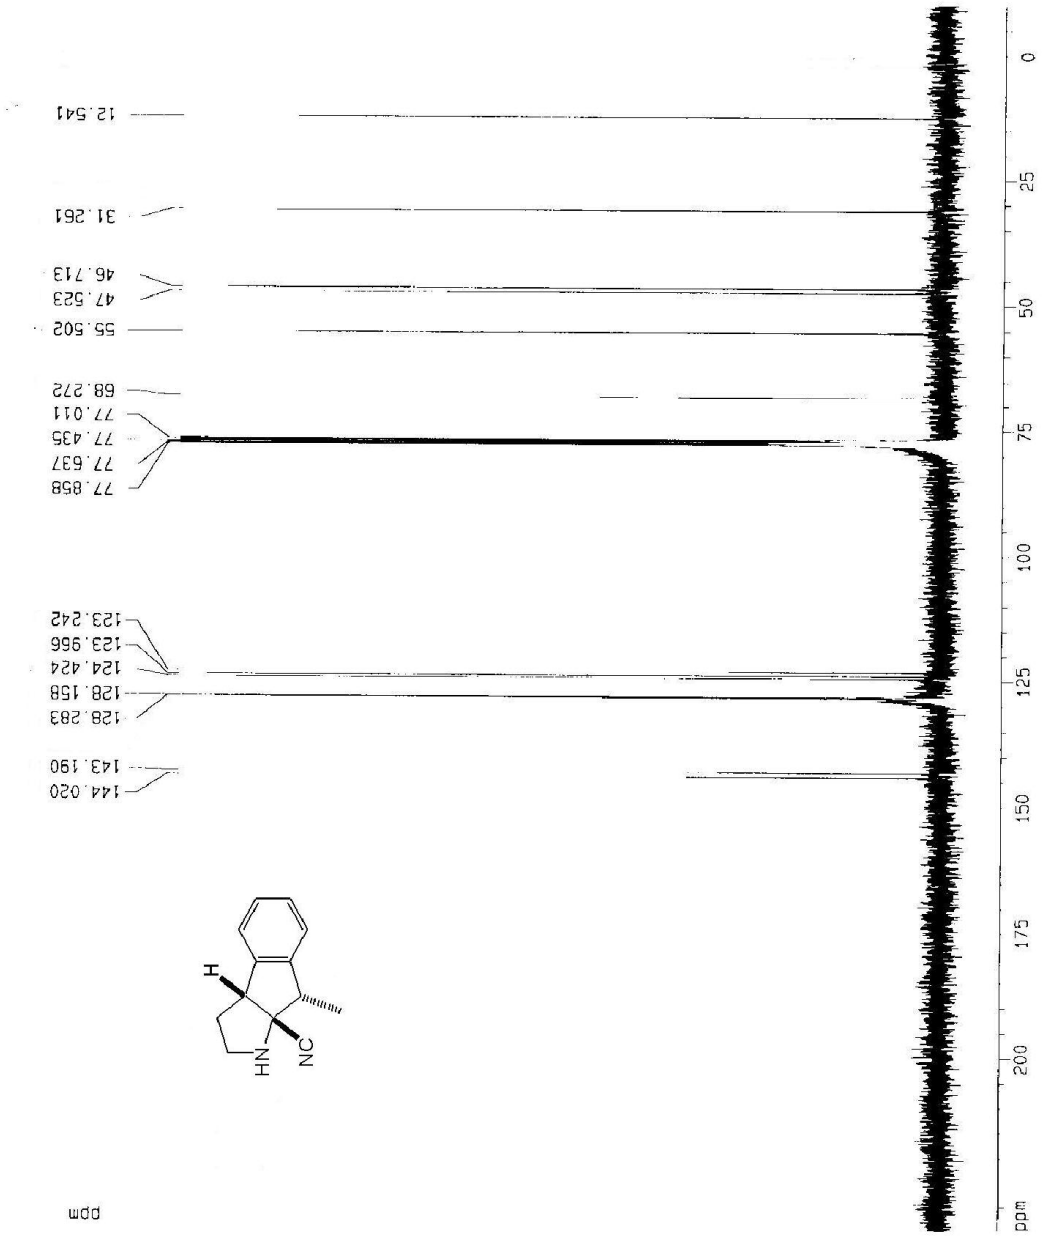



```

Current Data Parameters
NAME      MRI-Aug13-04
EXPNO    3
PROCNO   1

F2 - Acquisition Parameters
Date_    20040813
Time     15.03
INSTRUM spect
PROBHD   5 mm BBI 1H-B
PULPROG zg30
TD       65536
SOLVENT  DMS-D6
NS       16
DS       2
SWH      8276.146 Hz
FIDRES   0.126314 Hz
AQ       3.9584243 sec
RG       143.7
DM       60.400 usec
DE       6.00 usec
TE       300.0 K
D1       1.0000000 sec

===== CHANNEL f1 =====
NUC1     1H
P1       6.45 usec
PL1     0.00 dB
SFO1    400.1324710 MHz

F2 - Processing parameters
SI       32768
SF       400.1300000 MHz
WDW      nd
SSB      0
LB       0.00 Hz
GB       0
PC       1.00

1D NMR plot parameters
CX       20.00 cm
F1P     10.000 ppm
F1      4001.30 Hz
F2P     -1.000 ppm
F2      -400.13 Hz
PPMCM   0.55000 ppm/cm
HZCM    220.07150 Hz/cm
    
```

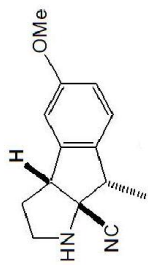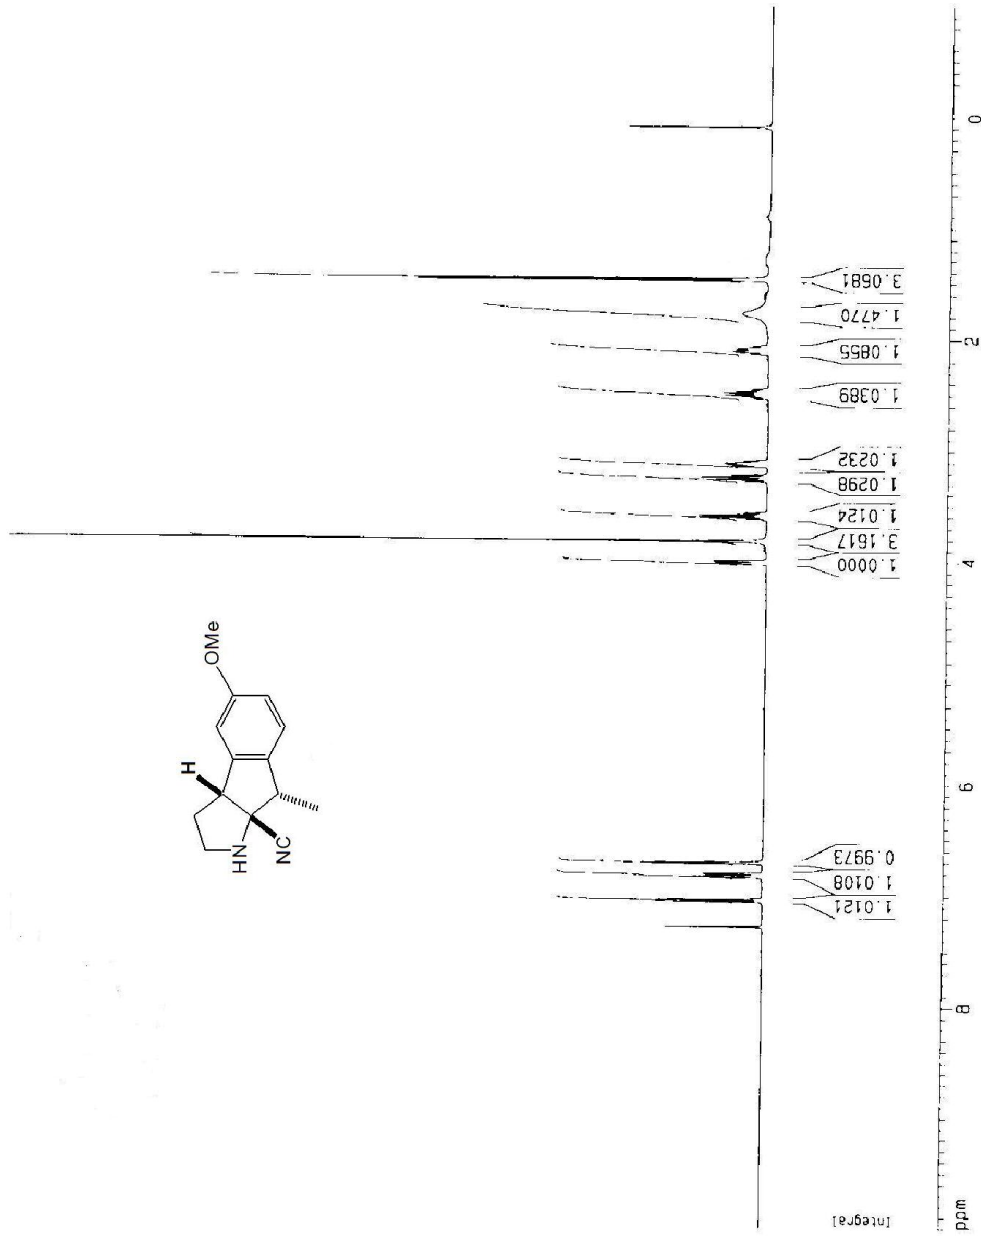

```

Current Data Parameters
NAME      MRI-Aug-2-04
EXPNO    1
PROCNO   1

F2 - Acquisition Parameters
Date_     20040814
Time      8.12
Spect     5
PROBHD    5 mm Multinu
PULPROG   zgpg30
TD        65536
SOLVENT   CDCl3
NS        12828
DS        4
SWH        18632.393 Hz
FIDRES    0.287360 Hz
AQ        1.7400308 sec
RG        16384
Dw        26.550 usec
DE        6.00 usec
TE        300.0 K
D1        2.0000000 sec
d11       0.0300000 sec
d12       0.0002000 sec

===== CHANNEL f1 =====
NUC1      13C
P1        5.60 usec
PL1       -8.00 dB
SFO1      75.4760200 MHz

===== CHANNEL f2 =====
CPDPRG2   mltz15
NUC2      1H
P2        114.00 usec
PL2       -6.00 dB
P3        18.00 dB
P4        18.00 dB
SFO2      300.1312005 MHz

F2 - Processing parameters
SI        32768
SF        75.4671950 MHz
WDW       EM
SSB       C
LB        1.00 Hz
GB        0
PC        1.40

1D NMR pict parameters
CX        20.00 cm
F1P       234.765 ppm
F2P       177.745 Hz
F2Q       -24.778 ppm
PP4CM     -1115.24 Hz
PZCM      12.47712 ppm/cm
RZCM      941.61963 Hz/cm
    
```

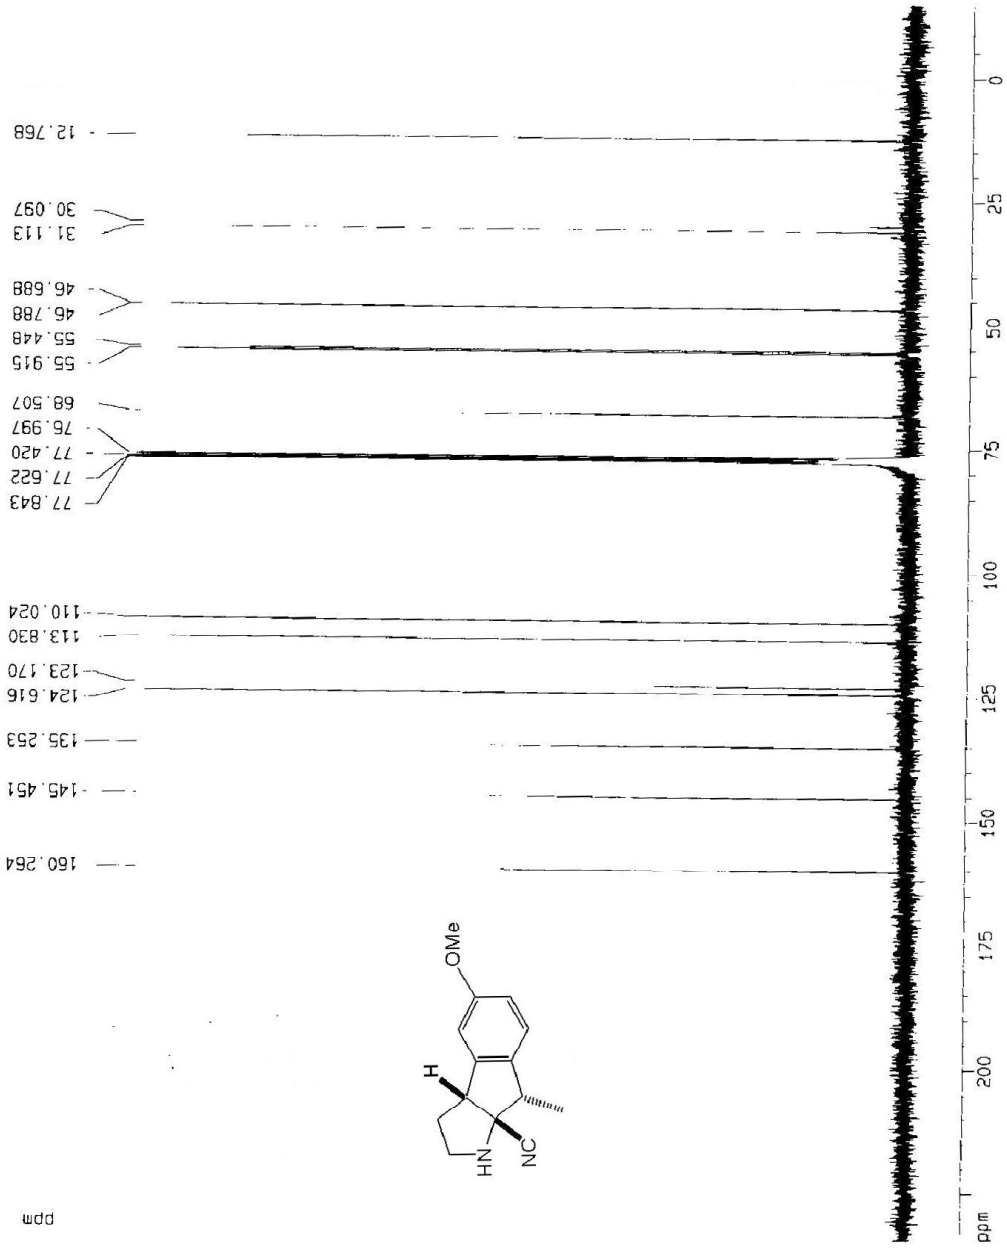

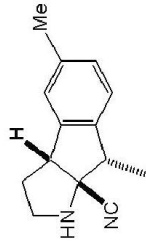

Current Data Parameters  
 NAME MRI-Aug04-04  
 EXPNO 2  
 PROCNO 1

F2 - Acquisition Parameters  
 Date\_ 20040804  
 Time 17.54  
 INSTRUM spect  
 PROBHD 5 mm BBI 1H-B  
 PULPROG zg30  
 TD 65536  
 SOLVENT CDCl3  
 NS 16  
 DS 2  
 SWH 8278.146 Hz  
 FIDRES 0.126314 Hz  
 AQ 3.9564243 sec  
 RG 128  
 DW 60.400 usec  
 DE 6.00 usec  
 TE 300.0 K  
 D1 1.00000000 sec

\*\*\*\*\* CHANNEL f1 \*\*\*\*\*  
 NUC1 1H  
 P1 6.45 usec  
 PL1 0.00 dB  
 SF01 400.1324710 MHz

F2 - Processing parameters  
 S1 32768  
 SF 400.1300000 MHz  
 NDM rd  
 SSB 0  
 LB 0.00 Hz  
 GB 0  
 PC 1.00

1D NMR plot parameters  
 CX 20.00 cm  
 F4P 10.000 ppm  
 F1 4001.30 Hz  
 F2P -1.000 ppm  
 F2 -400.13 Hz  
 PPMCK 0.55000 ppm/cm  
 HZCM 220.07150 hz/cm

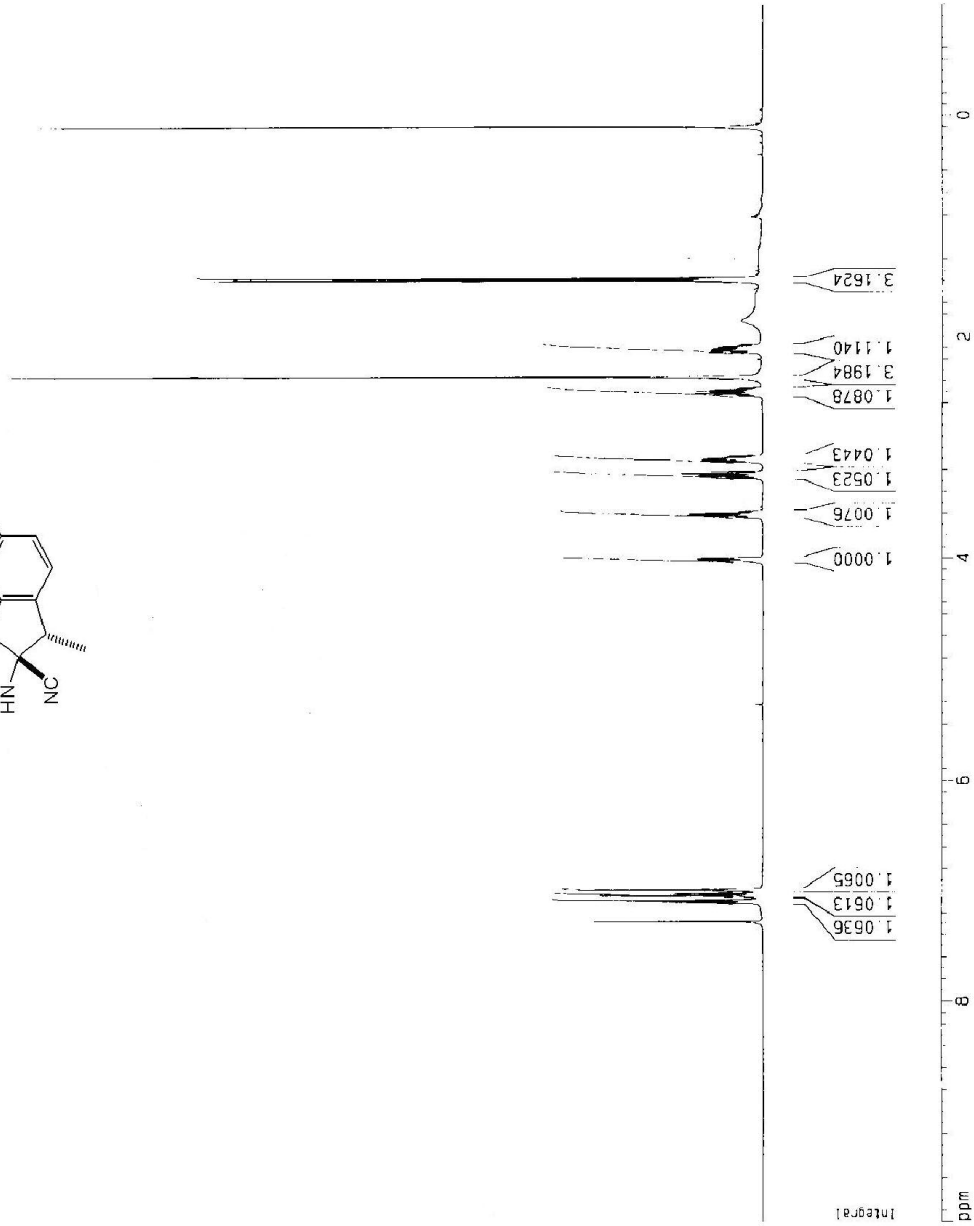

```

Current Data Parameters
NAME      M01-AUG08-04
EXPNO    1
PROCNO   1
-----
F2 - Acquisition Parameters
Date_    23040807
Time     9.48
INSTRUM  spect
PROBHD   5 mm WJ111Pv
PULPROG  zgpg30
TD       65536
SOLVENT  DMS-D6
NS       14000
DS       4
SFO1     18832.393 Hz
FIDRES   0.2812660 Hz
AQ       1.74003508 sec
RG       16384
CW       28.560 usec
DE       6.00 usec
TE       300.0 K
C1       2.00000000 sec
C2       0.03000000 sec
C3       0.00020000 sec
-----
CHANNEL f1
NUC1     13C
P1       5.00 usec
PL1     -6.00 dB
SFO1    75.4760200 MHz
-----
CHANNEL f2
CPDPRG2  waltz16
NUC2     1H
PCPD2    114.00 usec
PL2     -6.00 dB
PL12    18.00 dB
PL13    18.00 dB
SFO2    300.1312005 MHz
-----
F2 - Processing parameters
SI       32768
SF       75.4677190 MHz
RG       0
SBB      EM
GB       0
PC       1.40
-----
1D NMR plot parameters
CX       20.00 cm
F1P      210.000 ppm
F1       45648.22 Hz
F2P      -10.000 ppm
F2       -754.68 Hz
SFOCK    31.00000 ppm/cm
SFOCV    630.14450 Hz/cm
    
```

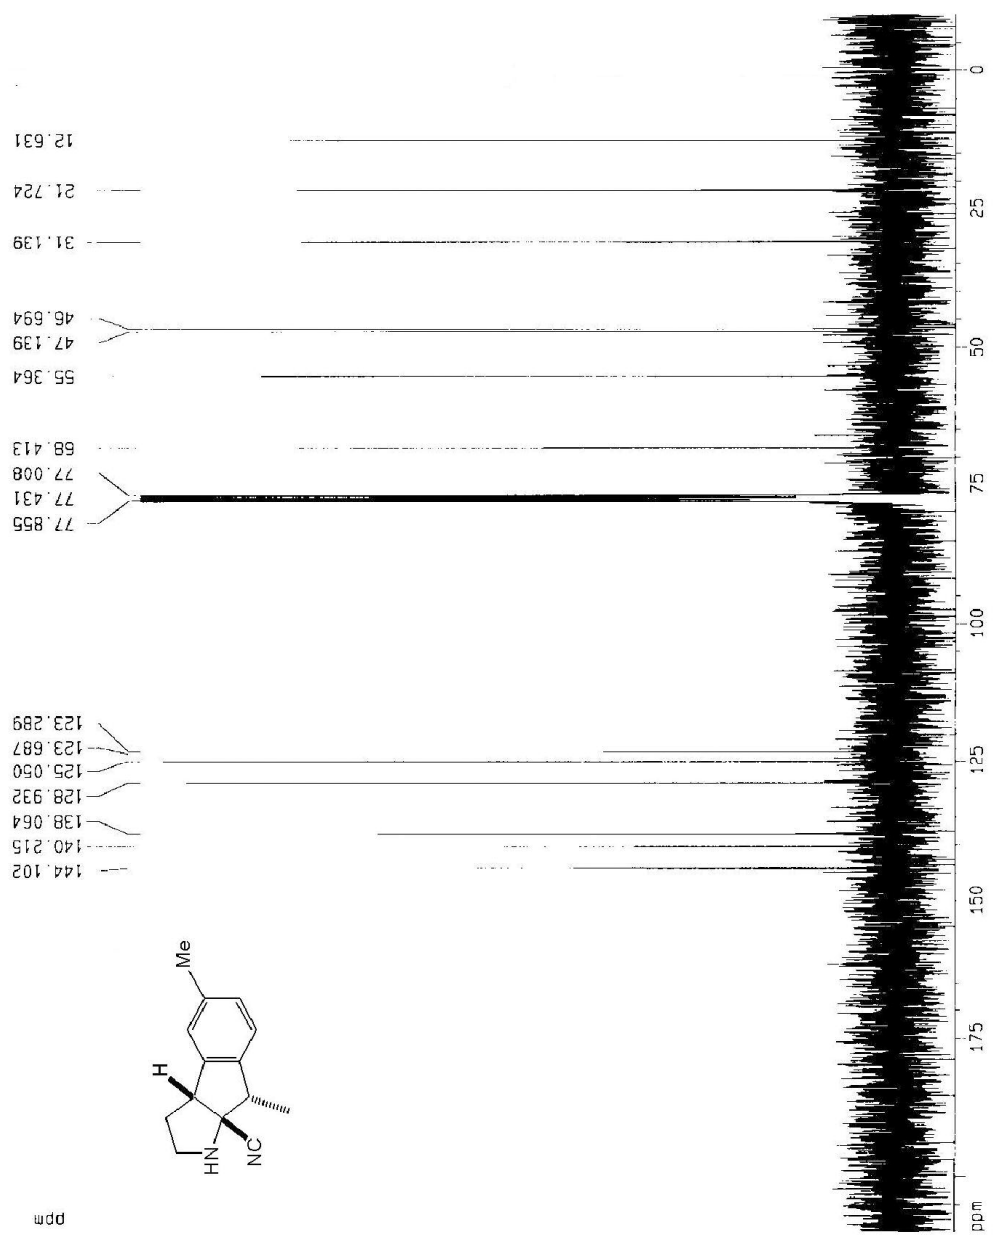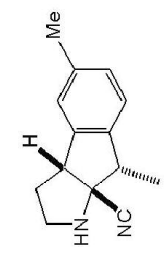

```

Current Data Parameters
NAME      MRI-Aug12-04
EXPNO    1
PROCNO   1

F2 - Acquisition Parameters
Date_    20040812
Time     18.42
INSTRUM spect
PROBHD   5 mm BBI 1H-B
PULPROG zg30
TD       65536
SOLVENT  CDCl3
NS       12
DS       2
SWH      8278.146 Hz
FIDRES   0.126314 Hz
AQ       3.9584243 sec
RG       256
DW       60.400 usec
DE       6.00 usec
TE       300.0 K
D1       1.00000000 sec

***** CHANNEL f1 *****
NUC1     1H
P1       5.45 usec
PL1     0.00 dB
SFO1    400.1324710 MHz

F2 - Processing parameters
SI       32768
SF       400.1300000 MHz
WDW      nc
SSB      0
LB       0.00 Hz
GB       0
PC       1.00

1D NMR plot parameters
CX       20.00 cm
F1P     -10.000 ppm
F1       4001.30 Hz
F2P     -1.000 ppm
F2       -400.13 Hz
SFOCM   0.55000 ppm/cm
HZCM    220.07149 Hz/cm
    
```

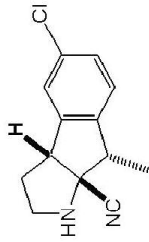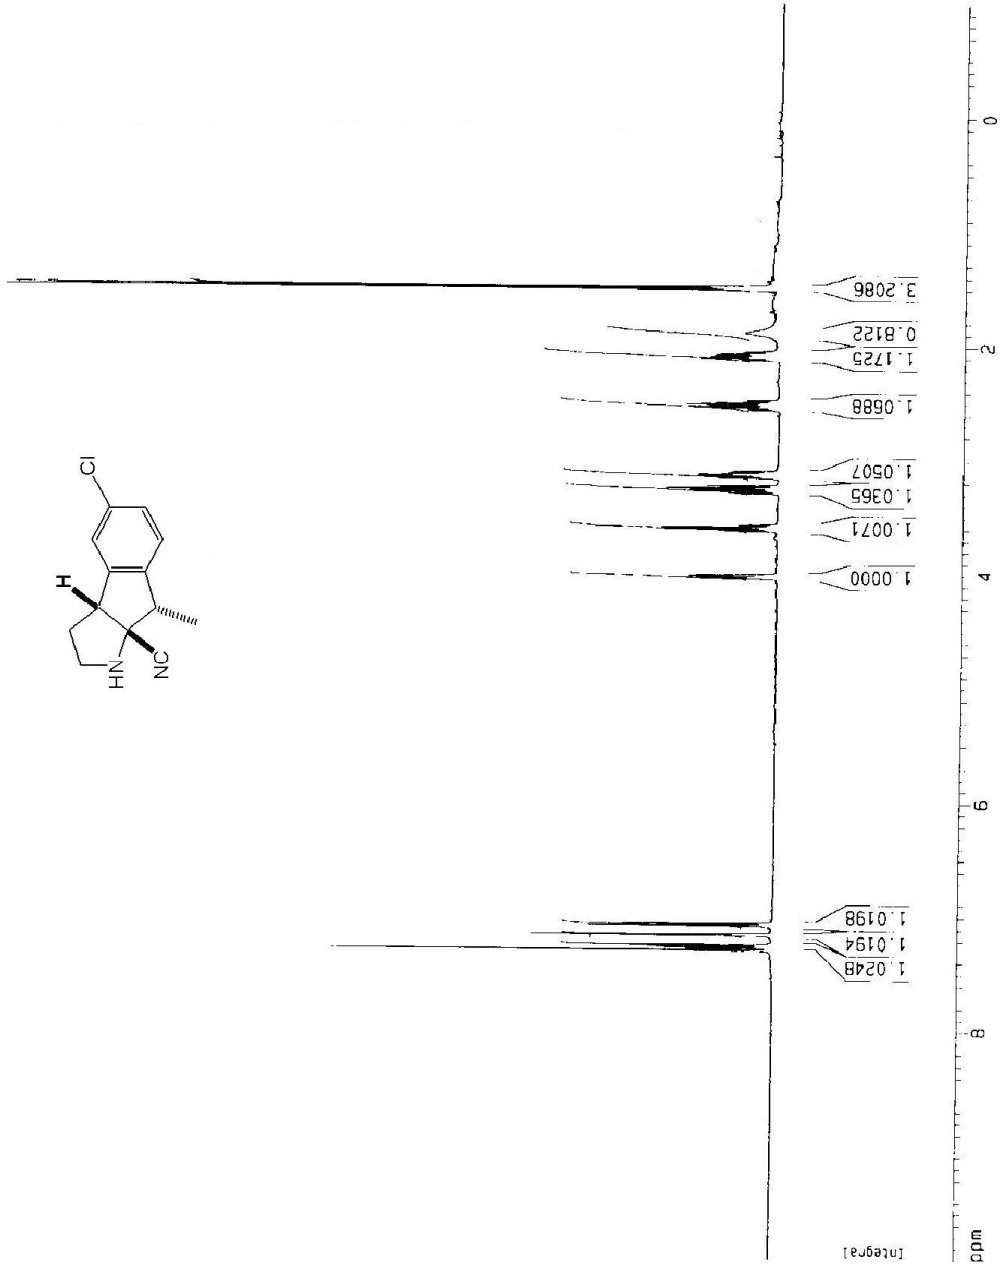

```

Current Data Parameters
NAME      MRI-Aug10-04
EXPNO    2
PROCNO   1

F2 - Acquisition Parameters
Date_    20040811
Time     8:45
INSTRUM  spect
PROBHD   5 mm DNP 1H/1
PULPROG  zgpg30
TD        65536
SOLVENT  CDCl3
NS        13000
DS        4
SWH       18796.992 Hz
FIDRES    0.286819 Hz
AQ        1.7433076 sec
RG         1024
CM        26.600 usec
DE         6.00 usec
TE        300.0 K
D1        2.00000000 sec
D11       0.03000000 sec
D12       0.00002000 sec

===== CHANNEL f1 =====
NUC1      13C
P1        5.40 usec
PL1       -6.00 dB
SFO1      75.4106357 MHz

===== CHANNEL f2 =====
CPDPRG2   waltz16
NUC2      1H
P2        115.00 usec
PL2       0.00 dB
PL12      20.00 dB
PL13      20.00 dB
SFO2      299.8711995 MHz

F2 - Processing parameters
SI        32768
SF        75.4023410 MHz
WDW       EM
SSB       0
LB        1.00 Hz
GB        0
PC        1.40

10 MHz plot parameters
CX        20.00 cm
FIP       220.000 ppm
F1        16588.51 Hz
F2P       -10.000 ppm
F2        -754.02 Hz
PPMCM     11.50000 ppm/cm
HZCM      867.12695 Hz/cm
    
```

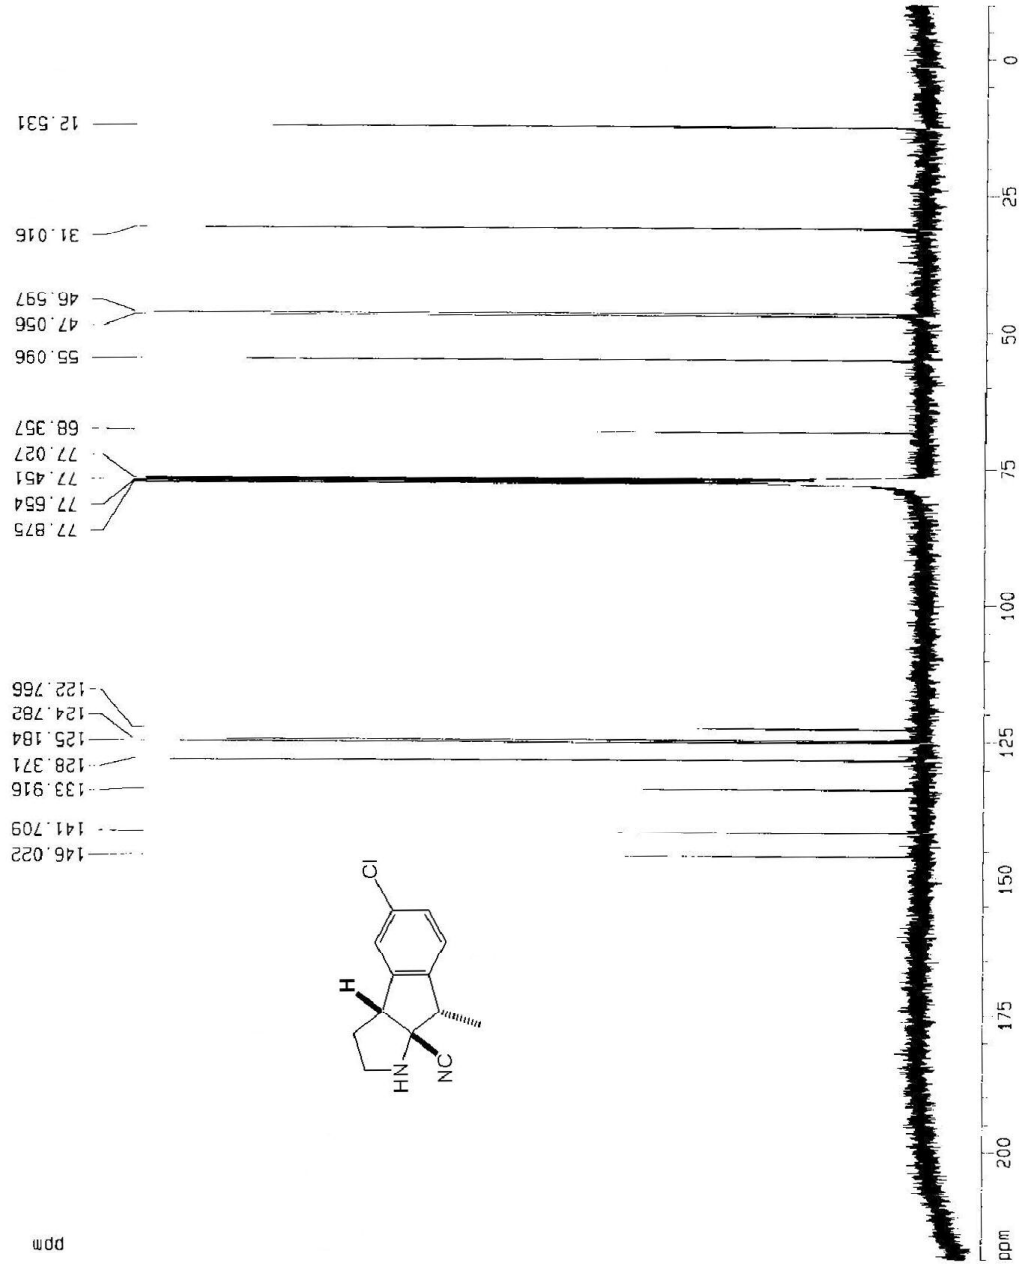

Supplement: NIHMS160340-supplement-data1.pdf [file NIHMS160340-supplement-data1.pdf]
