# Supplementary material
Source: PubMed Central journal article supplement (PMC2785442)
Supplement: NIHMS160340-supplement-data3.pdf [file NIHMS160340-supplement-data3.pdf]

Supporting Information (Part C) for

**Allenyl Azide Cycloaddition Chemistry. Exploration of the Scope and Mechanism of Cyclopentennelated Dihydropyrrole Synthesis through Azatrimethylenemethane (ATMM) Intermediates.**

*Ken S. Feldman,<sup>\*†</sup> Malliga R. Iyer,<sup>†</sup> Carlos Silva López,<sup>§</sup> and Olalla Nieto Faza<sup>§</sup>*

Department of Chemistry, The Pennsylvania State University, University Park, Pennsylvania 16802, USA, Departamento de Química Orgánica, Universidade de Vigo, Lagoas Marcosende, 36200, Vigo, Galicia, Spain, and Department of Chemistry, University of Minnesota, 207 Pleasant St. SE, Minneapolis, Minnesota 55455-0431, USA

|                                |     |
|--------------------------------|-----|
| <b>34</b> <sup>1</sup> H NMR   | S2  |
| <b>34</b> <sup>13</sup> C NMR  | S3  |
| <b>35</b> <sup>1</sup> H NMR   | S4  |
| <b>35</b> <sup>13</sup> C NMR  | S5  |
| <b>38a</b> <sup>1</sup> H NMR  | S6  |
| <b>38a</b> <sup>13</sup> C NMR | S7  |
| <b>38b</b> <sup>1</sup> H NMR  | S8  |
| <b>38b</b> <sup>13</sup> C NMR | S9  |
| <b>38c</b> <sup>1</sup> H NMR  | S10 |
| <b>38c</b> <sup>13</sup> C NMR | S11 |
| <b>39a</b> <sup>1</sup> H NMR  | S12 |
| <b>39a</b> <sup>13</sup> C NMR | S13 |
| <b>39b</b> <sup>1</sup> H NMR  | S14 |
| <b>39b</b> <sup>13</sup> C NMR | S15 |
| <b>39c</b> <sup>1</sup> H NMR  | S16 |
| X-ray structure of <b>23d</b>  | S18 |
| X-ray structure of <b>39a</b>  | S19 |

Current Data Parameters  
 NAME MFI-Ju127-06  
 EXPNO 5  
 PR0CNO 1

F2 - Acquisition Parameters  
 Date\_ 20060727  
 Time 12.56  
 INSTRUM spect  
 PROBHD 5 mm BBI 1H-B  
 PULPROG zg30  
 TD 65536  
 SOLVENT CDCl3  
 NS 16  
 DS 2  
 SWH 8278.146 Hz  
 FIDRES 0.126314 Hz  
 AQ 3.9584243 sec  
 RG 35.9  
 DW 60.400 usec  
 DE 5.00 usec  
 TE 300.0 K  
 D1 1.0000000 sec

===== CHANNEL f1 =====  
 NUC1 1H  
 P1 6.45 usec  
 PL1 0.00 dB  
 SF01 400.1324710 MHz

F2 - Processing parameters  
 SI 32768  
 SF 400.1300000 MHz  
 WDW no  
 SSB 0  
 LB 0.00 Hz  
 GB 0  
 PC 1.00  
 1D NMR plot parameters  
 CX 20.00 cm  
 F1P 10.000 ppm  
 F1 4601.30 Hz  
 F2P -1.000 ppm  
 F2 -400.13 Hz  
 PPMCM 0.55600 ppm/cm  
 HZCM 220.07150 Hz/cm

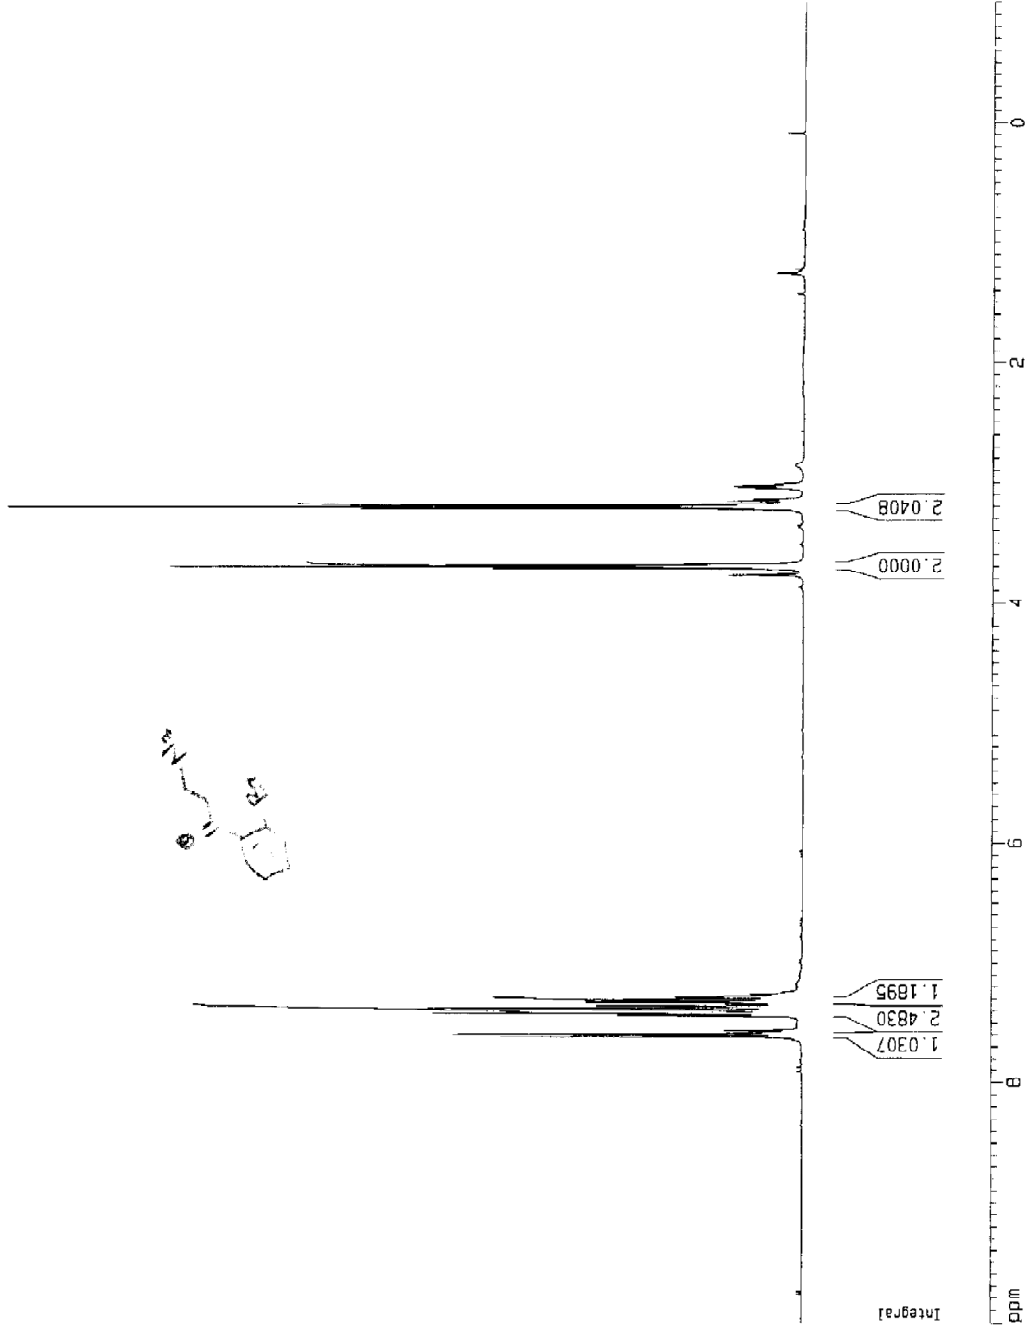

Current Data Parameters  
 NAME MRI-Jul27-06  
 EXPNO 5  
 PROCNO 1

F2 - Acquisition Parameters  
 Date\_ 20060727  
 Time 13.02  
 INSTRUM spect  
 PROBRD 5 mm BBI 1H-B  
 PULPROG zgpg30  
 TD 65536  
 SOLVENT CDCl3  
 NS 32  
 DS 4  
 SWH 25125.629 Hz  
 FIDRES 0.363387 Hz  
 AQ 1.3042164 sec  
 RG 9195.2  
 OW 15.500 usec  
 DE 5.00 usec  
 TE 300.0 K  
 U1 2.0000000 sec  
 d11 0.0300000 sec  
 d12 0.0000000 sec

==== CHANNEL f1 =====  
 NUC1 13C  
 P1 15.35 usec  
 PL1 -5.00 dB  
 SF01 100.6237559 MHz

==== CHANNEL f2 =====  
 CPDPRG2 waltz16  
 NUC2 1H  
 PCPD2 1.14.00 usec  
 PL2 0.00 dB  
 PL12 24.00 dB  
 PL13 24.00 dB  
 SF02 400.1315005 MHz

F2 - Processing parameters  
 S1 32768  
 SF 100.6127200 MHz  
 NH 4  
 SFO 0  
 LB 1.00 Hz  
 GB 0  
 PC 1.40

1D NMR plot parameters  
 CX 20.00 cm  
 F1P 234.858 ppm  
 F1 23589.72 Hz  
 F2P -20.000 ppm  
 F2 -2012.25 Hz  
 PPMCM 12.74281 ppm/cm  
 HCM 1282.09888 Hz/cm

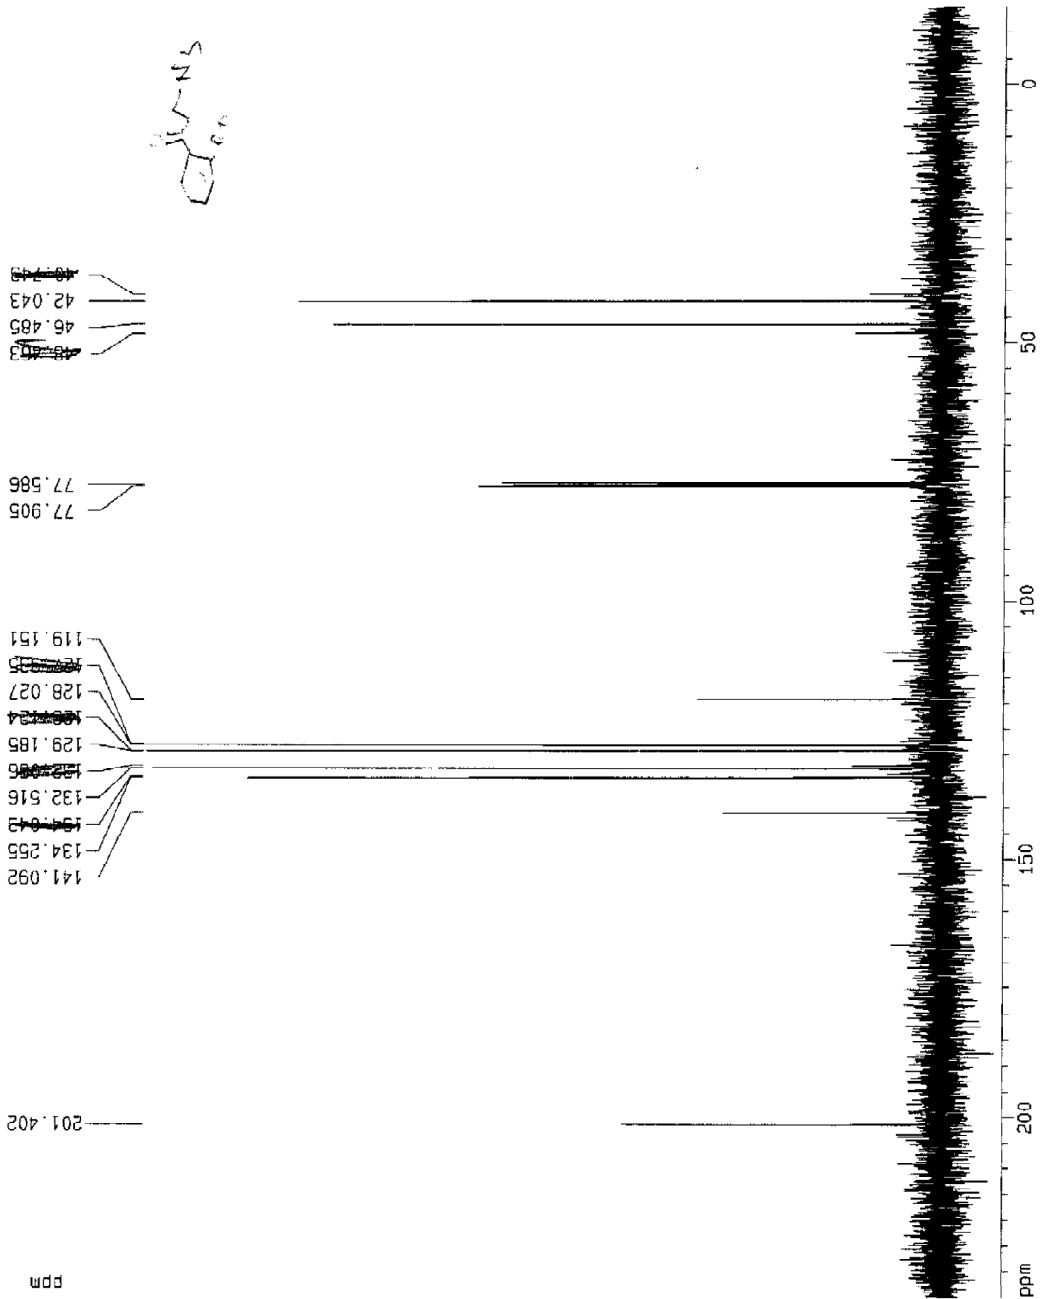

```

Current Data Parameters
NAME      MFI-Sept19-05
EXPNO    1
PROCNO   1

F2 - Acquisition Parameters
Date_    20060919
Time     9.48
INSTRUM  spect
PROBHD   5 mm BBI 1H-3
PULPROG  zg30
TD        65536
SOLVENT  CDCl3
NS        14
DS        2
SMH       8278.145 Hz
FIDRES    0.126314 Hz
AQ         3.1996243 sec
RG         40.3
DM         50.400 usec
DE         5.00 usec
TE         300.0 K
D1         1.0300000 sec

===== CHANNEL f1 =====
NUC1      1H
P1         6.45 usec
PL         0.00 dB
SF01      400.1324710 MHz

F2 - Processing parameters
SI         32768
SF         400.1300000 MHz
WDW        r0
SSB         0
LB         0.00 Hz
GB         0
PC         1.00

1D NMR plot parameters
CX         20.00 cm
F1P        10.000 ppm
F1         4001.30 Hz
F2P        -1.000 ppm
F2         -400.13 Hz
PPMCM      0.55000 ppm/cm
HZCM       220.07150 Hz/cm
    
```

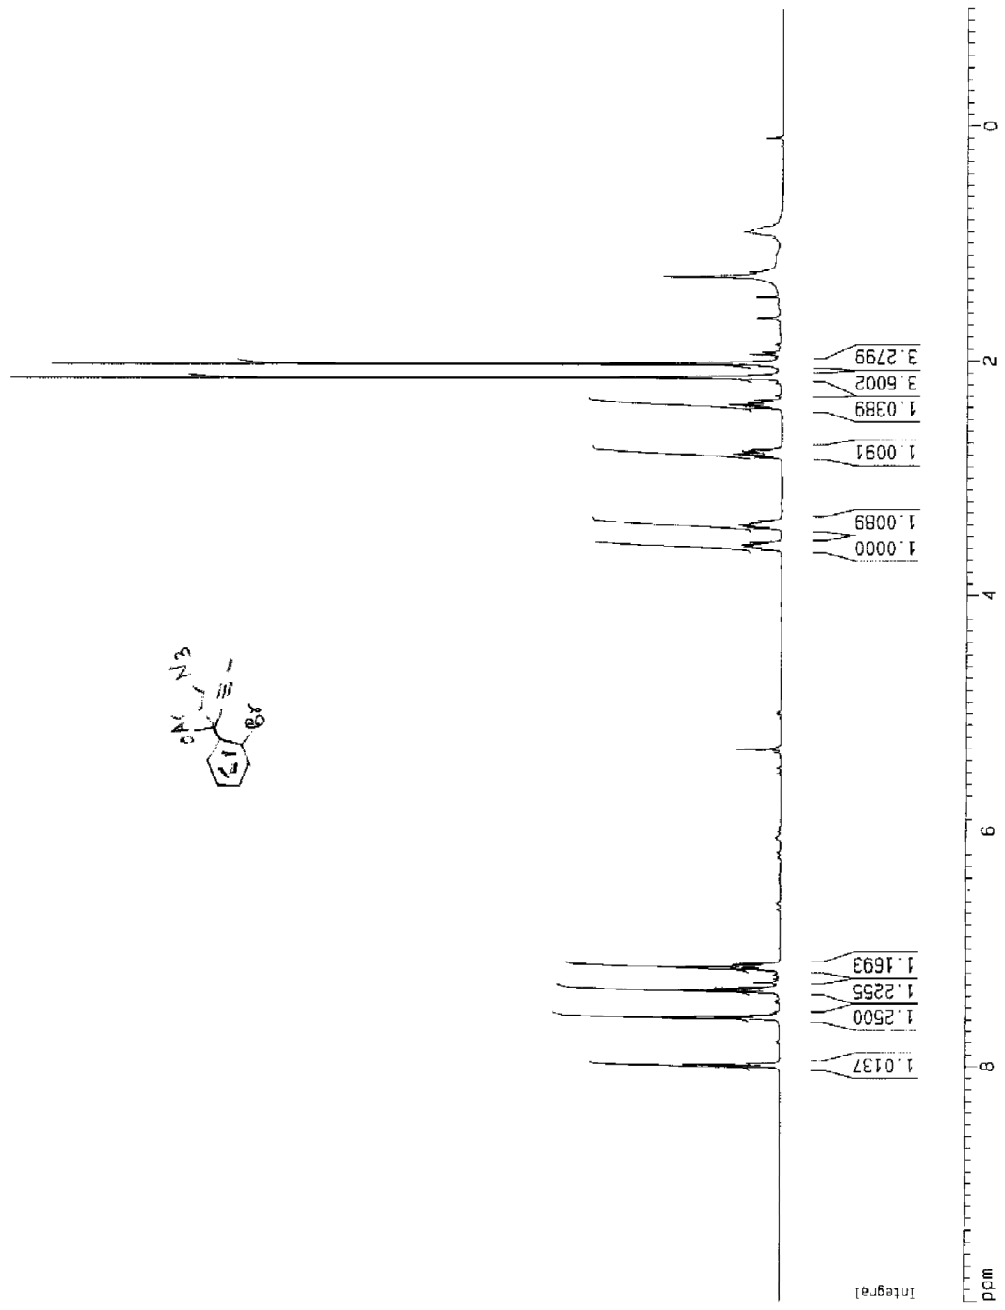

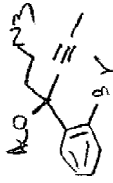

```

Current Data Parameters
NAME      MH1-Sept15-05
EXPNO    2
PROCNO   1

F2 - Acquisition Parameters
Date_    20060919
Time     9.32
INSTRUM  spect
PROBHD   5 mm BBI 1H-B
PULPROG  zgpg30
TD       65536
SOLVENT  CDCl3
NS       201
DS       4
SWH      25125.689 Hz
FIDRES   0.392387 Hz
AQ       1.3042164 sec
RG       16384
DW       19.500 uS/c
DE       6.00 uS/c
TE       300.0 K
D1       2.0000000 sec
d11      0.0000000 sec
d12      0.0000000 sec

===== CHANNEL f1 =====
NUC1     13C
P1       16.35 uS/c
PL1      -6.00 dB
SF01     100.6237559 MHz

===== CHANNEL f2 =====
CPDPRG2  waltz16
NUC2     1H
P2       114.00 uS/c
PL2      0.00 dB
PL12     24.00 dB
PL13     24.00 dB
SF02     400.1316005 MHz

F2 - Processing parameters
SI       32768
SF       100.6127290 MHz
MAG      4
GB       0
PC       1.40

1D NMR plot Parameters
CX       20.00 cm
FLP      234.000 ppm
F1       23643.36 Hz
F2       -20.000 ppm
F2       -201.226 Hz
FPCW     42.70000 ppm/Hz
KZCW     1277.76186 Hz/Hz
    
```

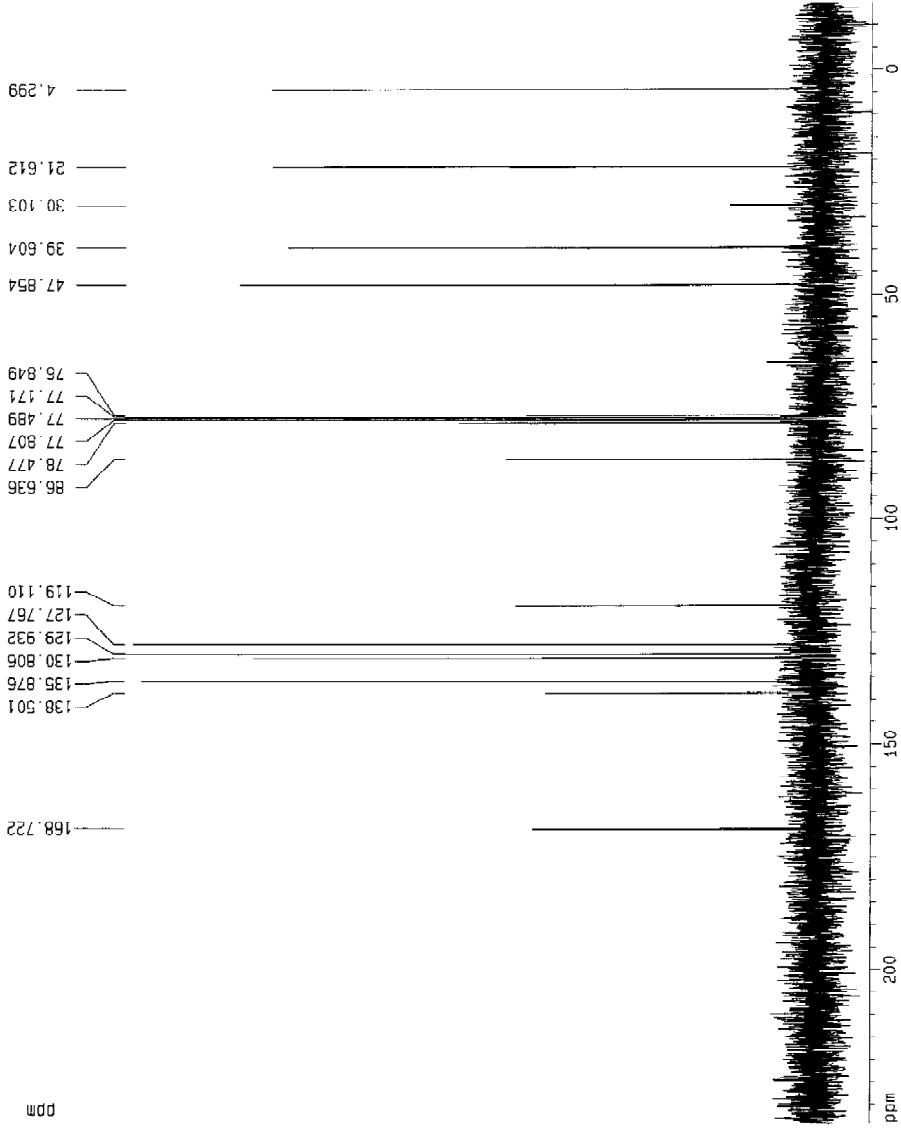

Current Data Parameters  
 NAME MRI-Jul27-05  
 EXPNO 3  
 PROCNO 1

F2 - Acquisition Parameters  
 Date\_ 20050727  
 Time 10.35  
 INSTRUM spect  
 PROBHD 5 mm BBI 1H-B  
 PULPROG zg30  
 TD 65536  
 SOLVENT CDCl3  
 NS 16  
 DS 2  
 SFO1 327.68 Hz  
 FIDRES 0.126314 Hz  
 AQ 3.9564243 sec  
 RG 71.8  
 DH 60.460 usec  
 DE 5.00 usec  
 TE 300.0 K  
 D1 1.0000000 sec

===== CHANNEL f1 =====  
 NUC1 1H  
 P1 6.45 usec  
 PL1 0.00 dB  
 SFO1 400.1324710 MHz

F2 - Processing parameters  
 SI 32768  
 SF 400.1330000 MHz  
 HDW no  
 SSB 0  
 LB 0.00 Hz  
 GB 0

1D NMR plot parameters  
 CX 20.00 cm  
 F1P 10.000 ppm  
 F1 4001.30 Hz  
 F2P -1.000 ppm  
 F2 -400.13 Hz  
 PPMCM 0.55000 ppm/cm  
 HZCM 220.07148 Hz/cm

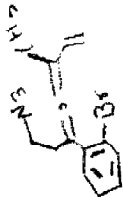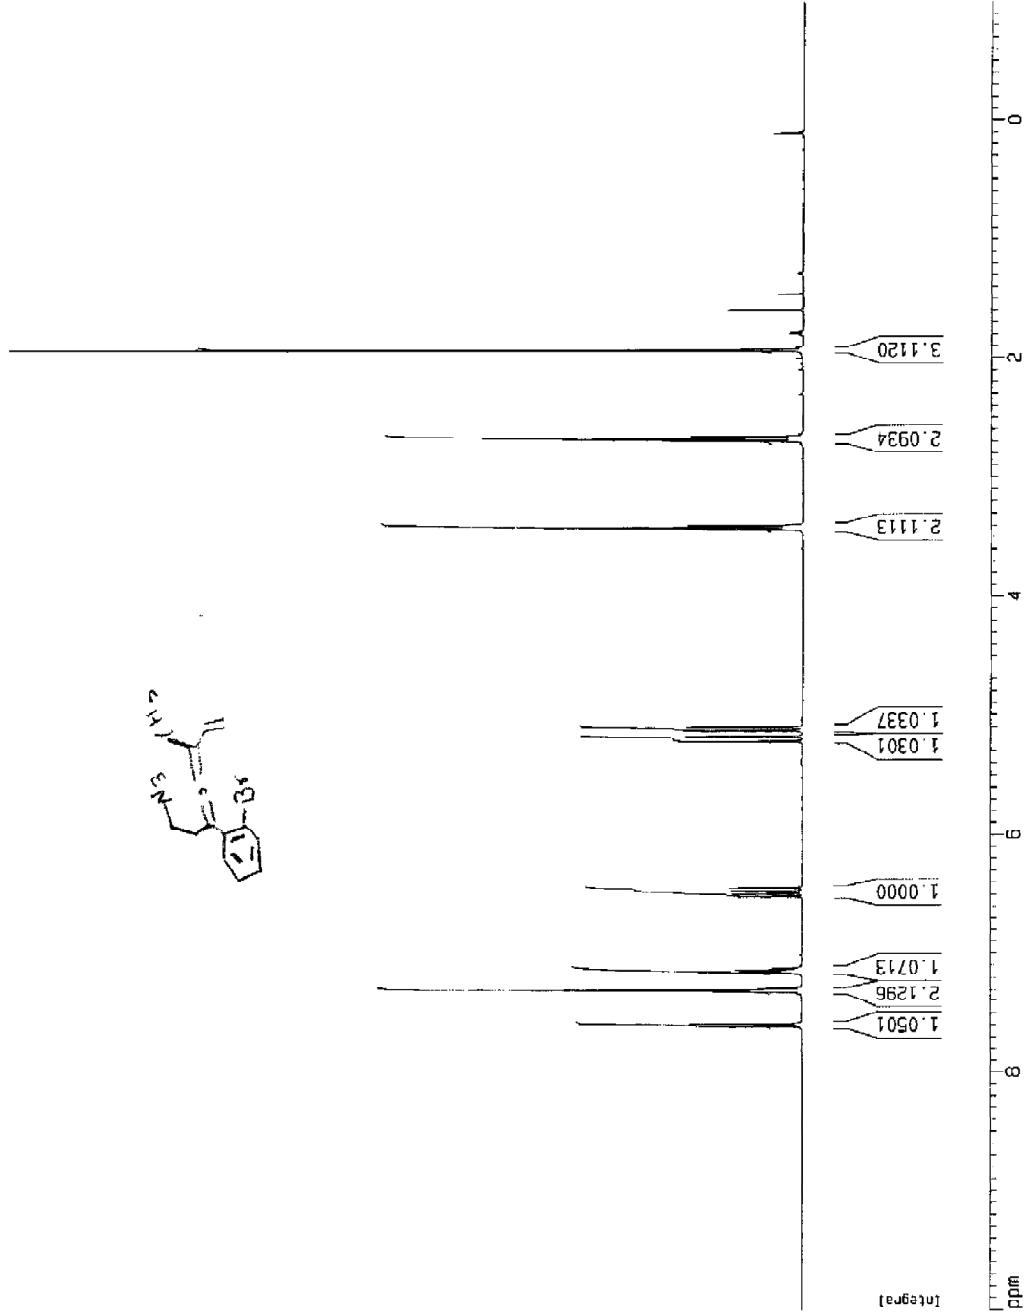

```

Current Data Parameters
NAME      M01-JUL27-06
EXPNO     4
PROCNO    1

F2 - Acquisition Parameters
Date_     20060727
Time      10.45
INSTRUM   spect
PROBHD    5 mm BBI 1H-B
PULPROG   zgpg30
TD         65536
SOLVENT   CDCl3
NS1        121
DS         4
SWH        25126.629 Hz
FIDRES     0.363387 Hz
AQ         1.3072164 sec
RG         16384
DM         19.900 usec
DE         6.00 usec
TE         300.0 K
D1         2.0000000 sec
d11        0.0300000 sec
d12        0.0002000 sec

===== CHANNEL f1 =====
NUC1       13C
P1         16.35 usec
PL1        -6.00 dB
SFO1       100.6237959 MHz

===== CHANNEL f2 =====
CPOPRG02  waltz16
NUC2       1H
PCPD02     114.00 usec
PL2        0.00 dB
PL12       24.00 dB
PL13       24.00 dB
SFO2       400.1316005 MHz

F2 - Processing parameters
SI         32768
SF         100.6127250 MHz
WDW        EM
SSB        0
LB         1.00 Hz
GB         0
PC         1.40

3D NMR plot parameters
CX         20.00 cm
F1P        234.944 ppm
F1         23628.35 Hz
F2P        -20.000 ppm
F2         -2012.25 Hz
PPMCH      12.74322 ppm/cm
HZCN       1202.02351 Hz/cm
    
```

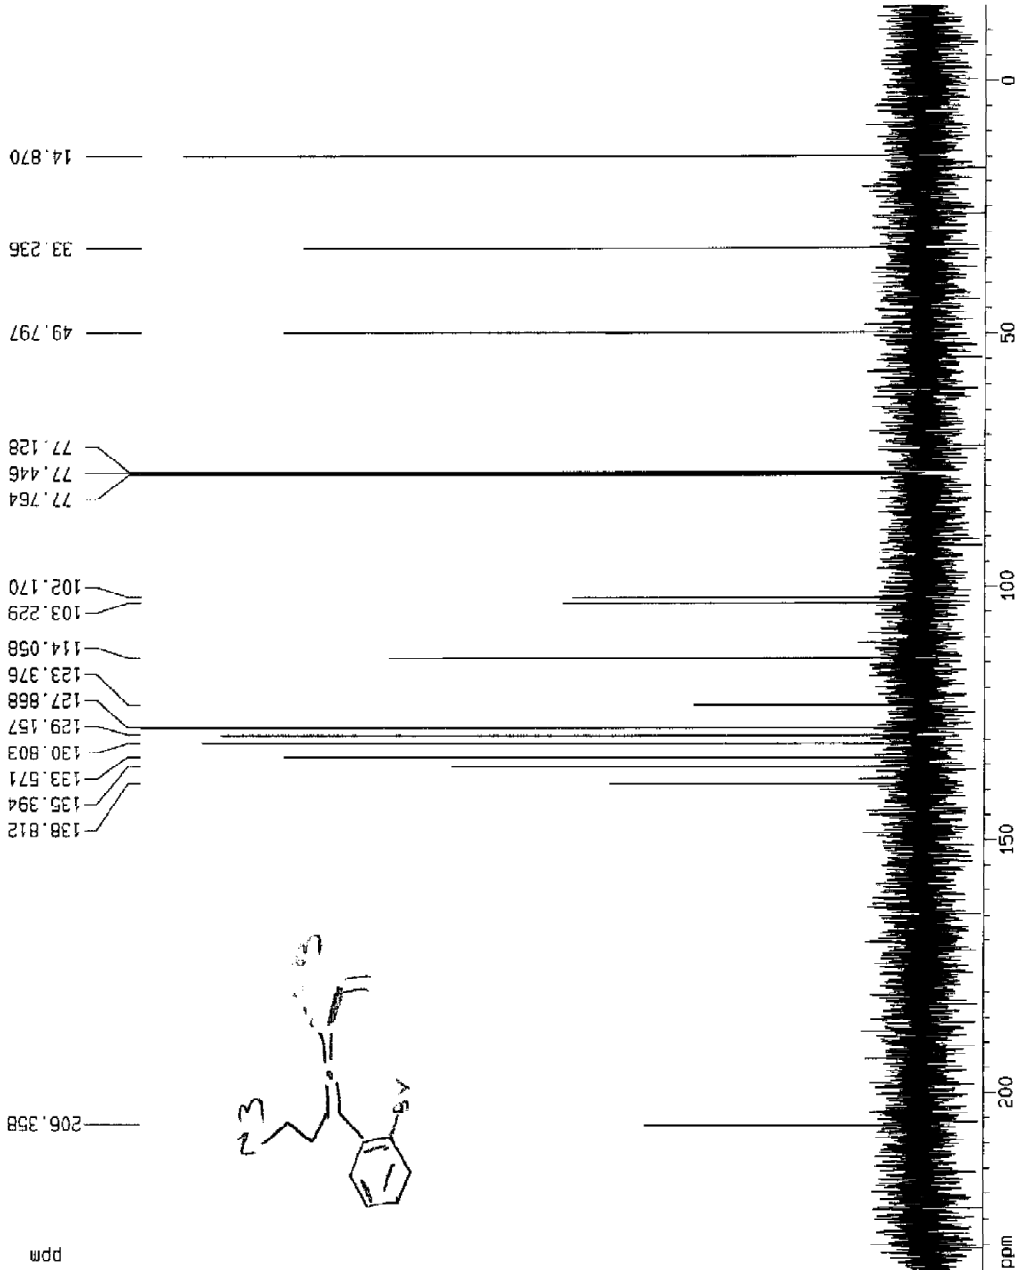

Current Data Parameters  
 NAME MRI-Nov10-06  
 EXPNO 4  
 PROCNO 1

F2 - Acquisition Parameters  
 Date\_ 20061110  
 Time 13:28  
 INSTRUM spect  
 PROCNO 5 mm BBI 1H-B  
 PULPROG zg30  
 TO 65536  
 SOLVENT CDCl3  
 NS 26  
 DS 2  
 SWH 8278.146 Hz  
 FIDRES 0.126314 Hz  
 AQ 3.8584243 sec  
 RG 1448.2  
 DM 50.400 usec  
 DE 6.00 usec  
 TE 300.0 K  
 D1 1.00000000 sec

===== CHANNEL f1 =====  
 NUC1 1H  
 P1 6.45 usec  
 PL1 0.00 dB  
 SFO1 400.1324710 MHz

F2 - Processing parameters  
 SI 32768  
 SF 400.1300000 MHz  
 WDM no  
 SSB 0  
 LB 0.00 Hz  
 GB 0  
 PC 1.00

1D NMR plot: parameters  
 CX 20.00 cm  
 F1 10.000 ppm  
 F2 4001.30 Hz  
 F3 -1.000 ppm  
 F4 -400.13 Hz  
 PPGM 0.55000 ppm/cm  
 HZCM 220.07150 Hz/cm

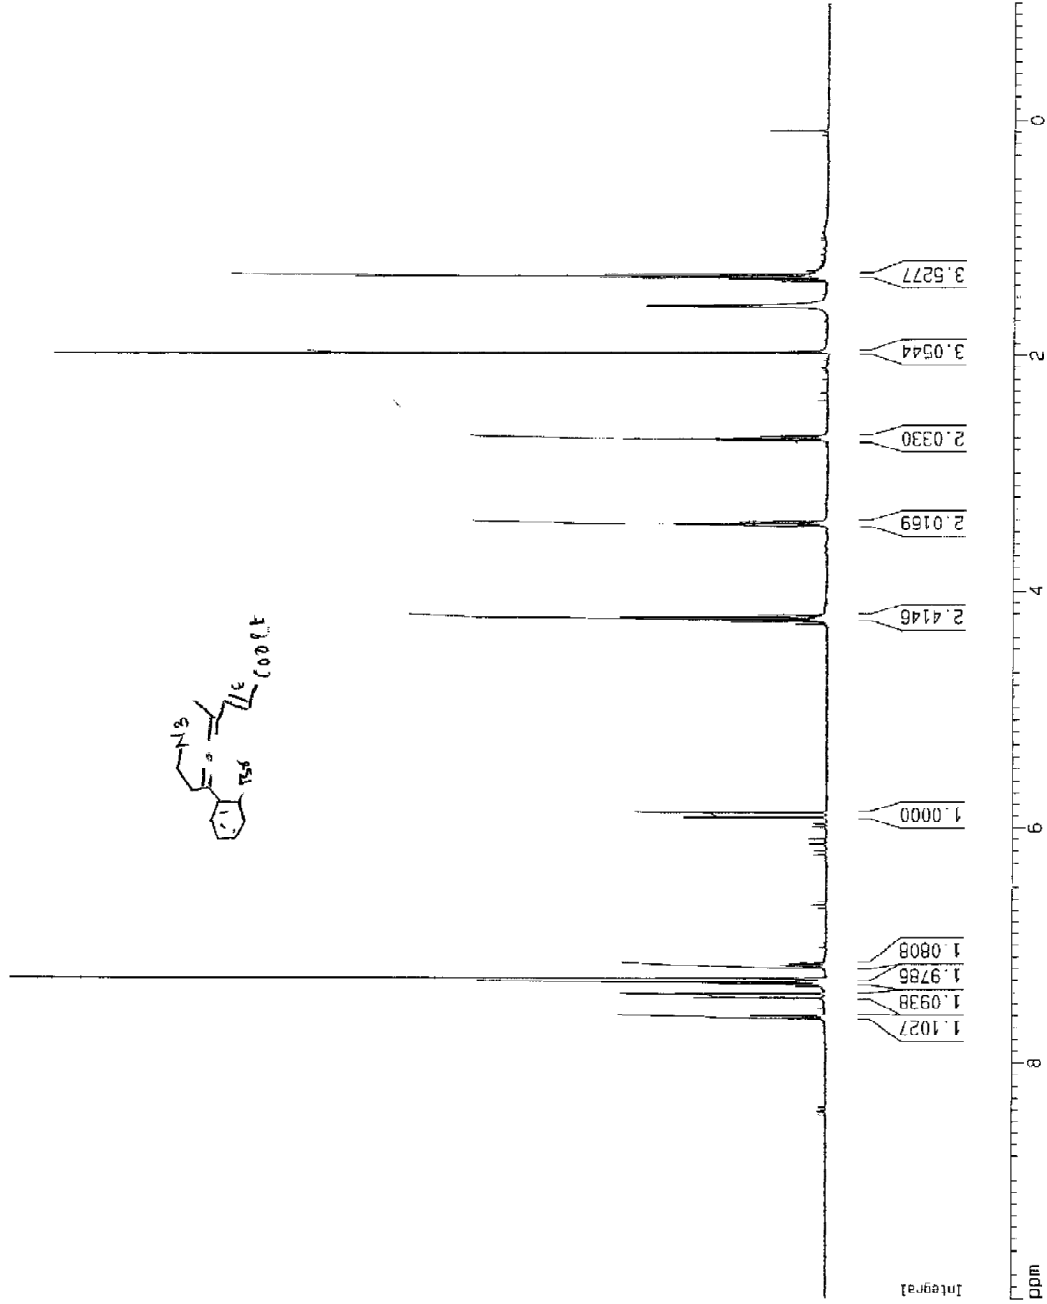



38b

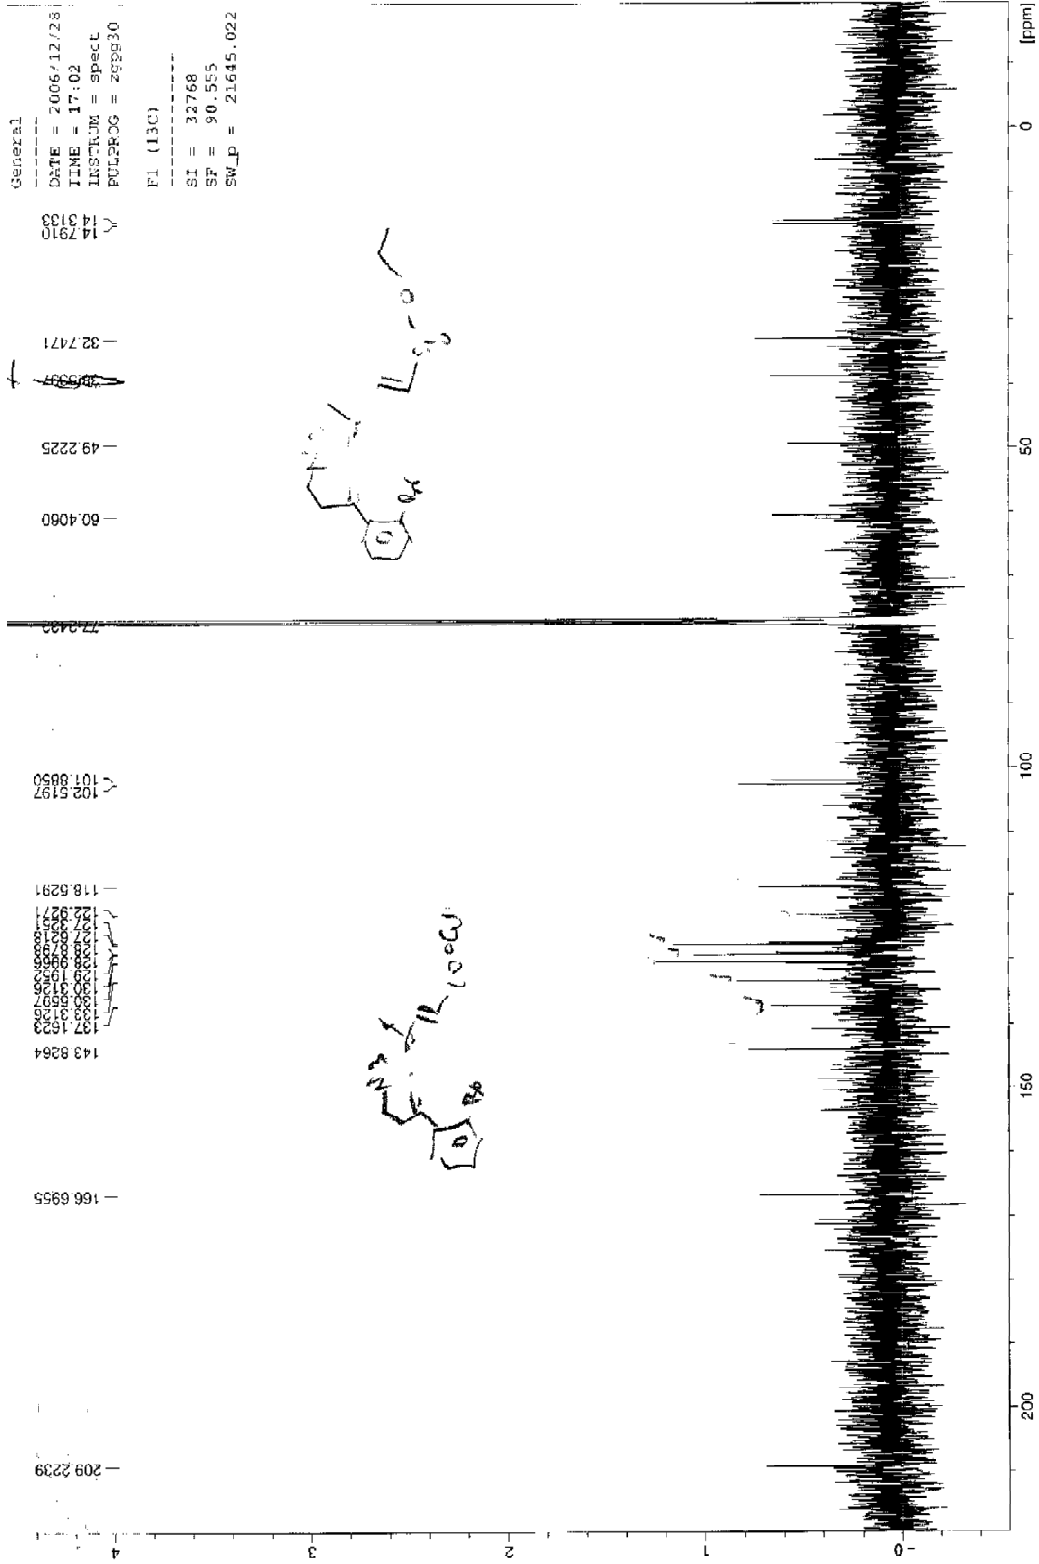

Current Data Parameters  
 NAME MRI-Oct28-05  
 EXPNO 1  
 PROCNO 1

F2 - Acquisition Parameters

Date\_ 20051028  
 Time\_ 16:11  
 INSTRUM spect  
 PROBHD 5 mm BBI 1H-8  
 PULPRG ZG30  
 TO 65535  
 SOLVENT CDCl3  
 NS 16  
 DS 2  
 SWH 8276.145 Hz  
 FIDRES 0.126314 Hz  
 AG 3.986243 sec  
 RG 256  
 CW 60.400 usec  
 DE 6.00 usec  
 TE 300.0 K  
 C1 1.00000000 sec

===== CHANNEL f1 =====  
 NUC1 1H  
 P1 6.45 usec  
 PL1 0.00 dB  
 SFO1 400.1324710 MHz

F2 - Processing parameters

SI 32768  
 SF 400.1300000 MHz  
 WDW CO  
 SSB 0  
 LB 0.00 Hz  
 GB 0  
 PC 1.00

1D NMR plot parameters  
 CX 20.00 cm  
 F1P 10.000 ppm  
 F1 4001.30 Hz  
 F2P -1.000 ppm  
 F2 -400.13 Hz  
 PPMCM 0 55000 ppm/c  
 HZCM 220.07150 Hz/cm

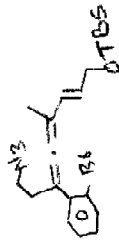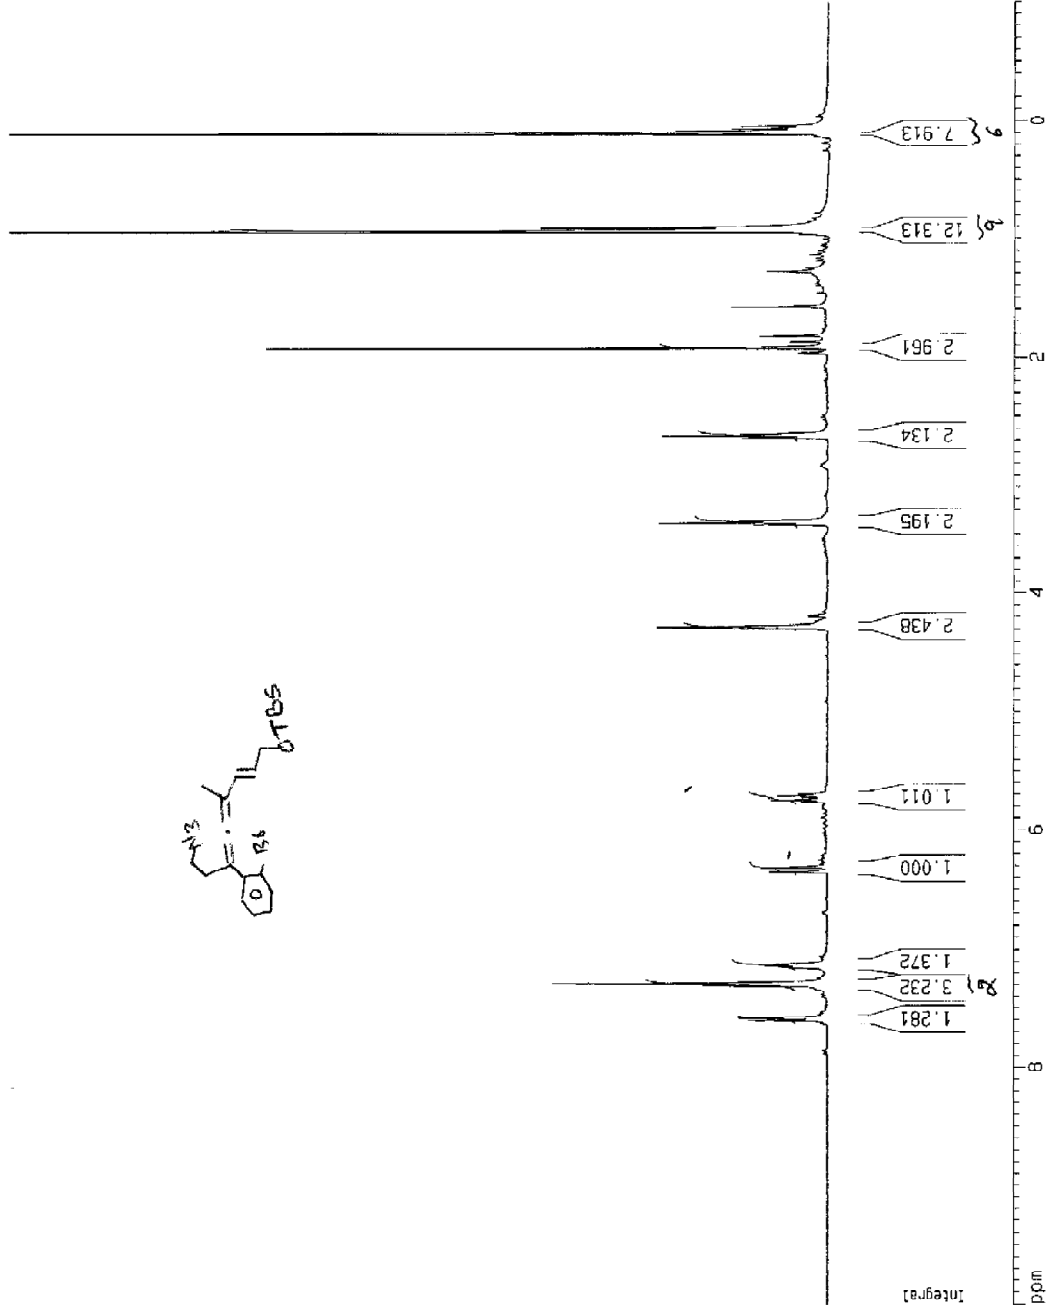

```

Current Data Parameters
NAME      NPT 0.175.06
EXPNO    1
PROCNO   1
F2 - Acquisition Parameters
Date_    20061026
Time     17.10
INSTRUM  spect
PROBHD   5 mm QNP 1H/1
PULPROG  zgpg30
IC       6553C
SOLVENT  CDCl3
NS       396
DS       4
SWH      16796.982 Hz
FIDRES   0.286819 Hz
AQ       1.74307E SEC
RG        4096
DC       26.600 usec
DE       6.00 usec
TE       300.0 K
D1       2.00000000 SEC
D11      0.03600000 SEC
D12      0.00000000 SEC

***** CHANNEL f1 *****
NUC1     13C
P1       5.40 usec
PL1     -6.00 dB
SFO1    75.4106357 MHz

***** CHANNEL f2 *****
CPDPRG2  waltz16
NUC2     1H
PCPD2   115.00 usec
PL2     0.00 dB
PL12    20.00 dB
PL13    20.00 dB
SFO2    299.8711985 MHz

F2 - Processing parameters
SI       32768
SF       75.4023410 MHz
ADW      EM
SSB      C
GB       1.00 Hz
GC       C
GCP      1.40

1D NMR plot parameters
CX       20.00 cm
F1P     234.651 ppm
F1      17693.24 Hz
F2P     -20.000 ppm
F2      -1503.05 Hz
PRMCM   12.73256 ppm/cp
AQZCM   360.06451 Hz/cm
    
```

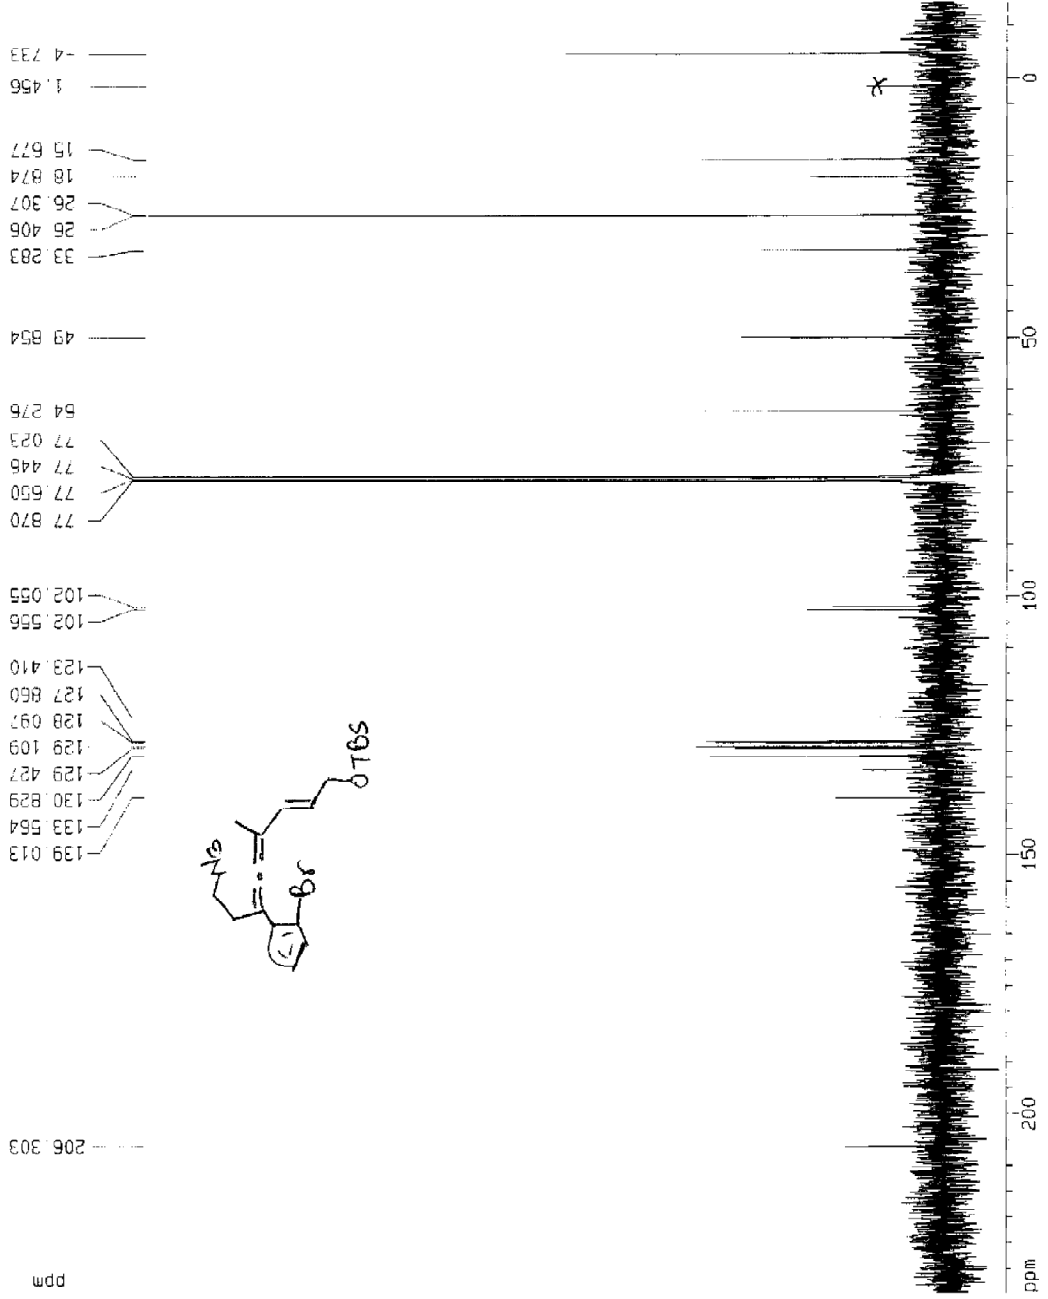

39a

```

Current Data Parameters
NAME      MFI-JUL29-06
EXPNO    1
PROCNO   1

F2 - Acquisition Parameters
Date_    20060729
Time     11.50
INSTRUM spect
PROBHD   5 mm BBI 1H-B
PULPROG zg30
TD       65536
SOLVENT  DMS-D6
NS       16
DS       2
SWH      8278.146 Hz
FIDRES   0.126314 Hz
AQ       3.9584243 sec
RG       161.3
DK       50.400 usec
DE       6.00 usec
TE       300.0 K
D1       1.00000000 sec

***** CHANNEL f1 *****
NUC1     1H
P1       6.45 usec
PL1      0.00 dB
SFO1     400.1324710 MHz

F2 - Processing parameters
SI       32768
SF       400.1300000 MHz
WDW      no
SSB      0
LB       0.00 Hz
GB       0
PC       1.00

1D NMR plot parameters
CX       20.00 cm
F1P      10.000 ppm
F1       4001.30 Hz
F2P      -1.000 ppm
F2       -400.13 Hz
PPMCM    0.85000 ppm/c
HZCM     220.07450 Hz/c
  
```

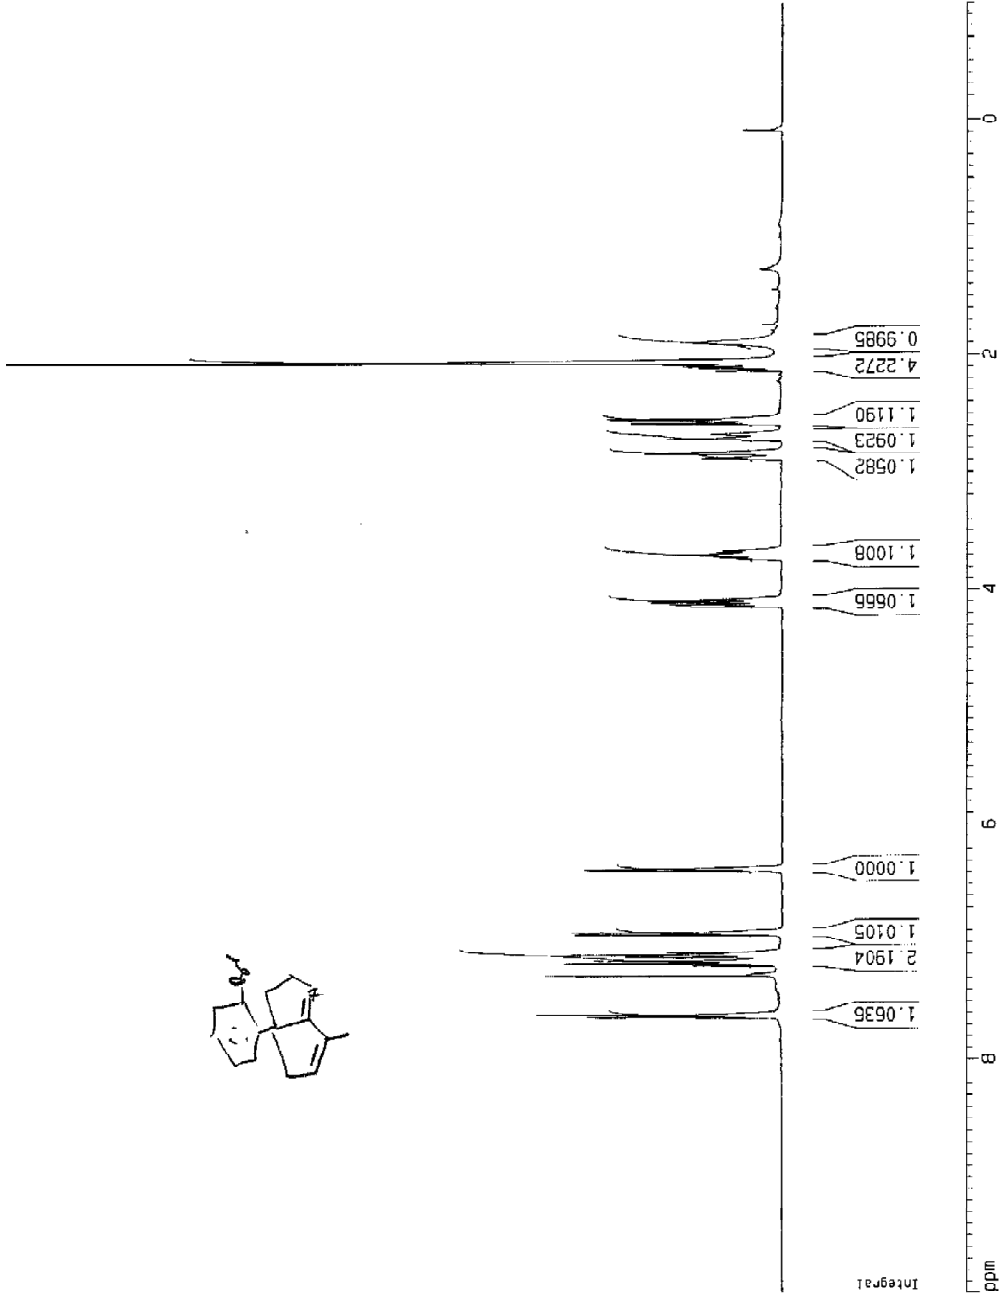

39a

Current Data Parameters  
NAME MRI-Ju129-06  
EXPRNO 1  
PROCNO 1  
F2 - Acquisition Parameters  
Date\_ 20060729  
Time 17:02  
INSTRUM spect  
PROBHD 5 mm QNP 1H/1  
PULPROG zgpg30  
TD 65536  
SOLVENT CDCl3  
NS 4500  
DS 4  
SWH 18795.952 Hz  
FIDRES 0.285819 Hz  
AQ 1.7433075 Sec  
RG 512  
BW 26.600 usec  
DE 5.00 usec  
TE 300.0 K  
D1 2.0000000 Sec  
D11 0.0300000 Sec  
D12 0.0000200 Sec  
===== CHANNEL f1 =====  
NUC1 13C  
P1 5.40 usec  
PL1 -6.00 dB  
SFO1 75.4106357 MHz  
===== CHANNEL f2 =====  
CPDPRG2 waltz16  
NUC2 1H  
PCPD2 1.15 00 usec  
PL2 0.00 dB  
PL12 20.00 dB  
PL13 20.00 dB  
SFO2 299.8711995 MHz  
F2 - Processing parameters  
SI 32768  
SF 75.4023410 MHz  
WDW EM  
SSB 0  
LB 1.00 Hz  
GB 0  
PC 1.40  
1D NMR plot parameters  
CX 20.00 cm  
F1P 234.651 ppm  
F1 17693.24 Hz  
F2P -20.000 ppm  
F2 -1508.05 Hz  
PPMCH 12.7395 ppm/cm  
HZCM 960.06433 Hz/cm

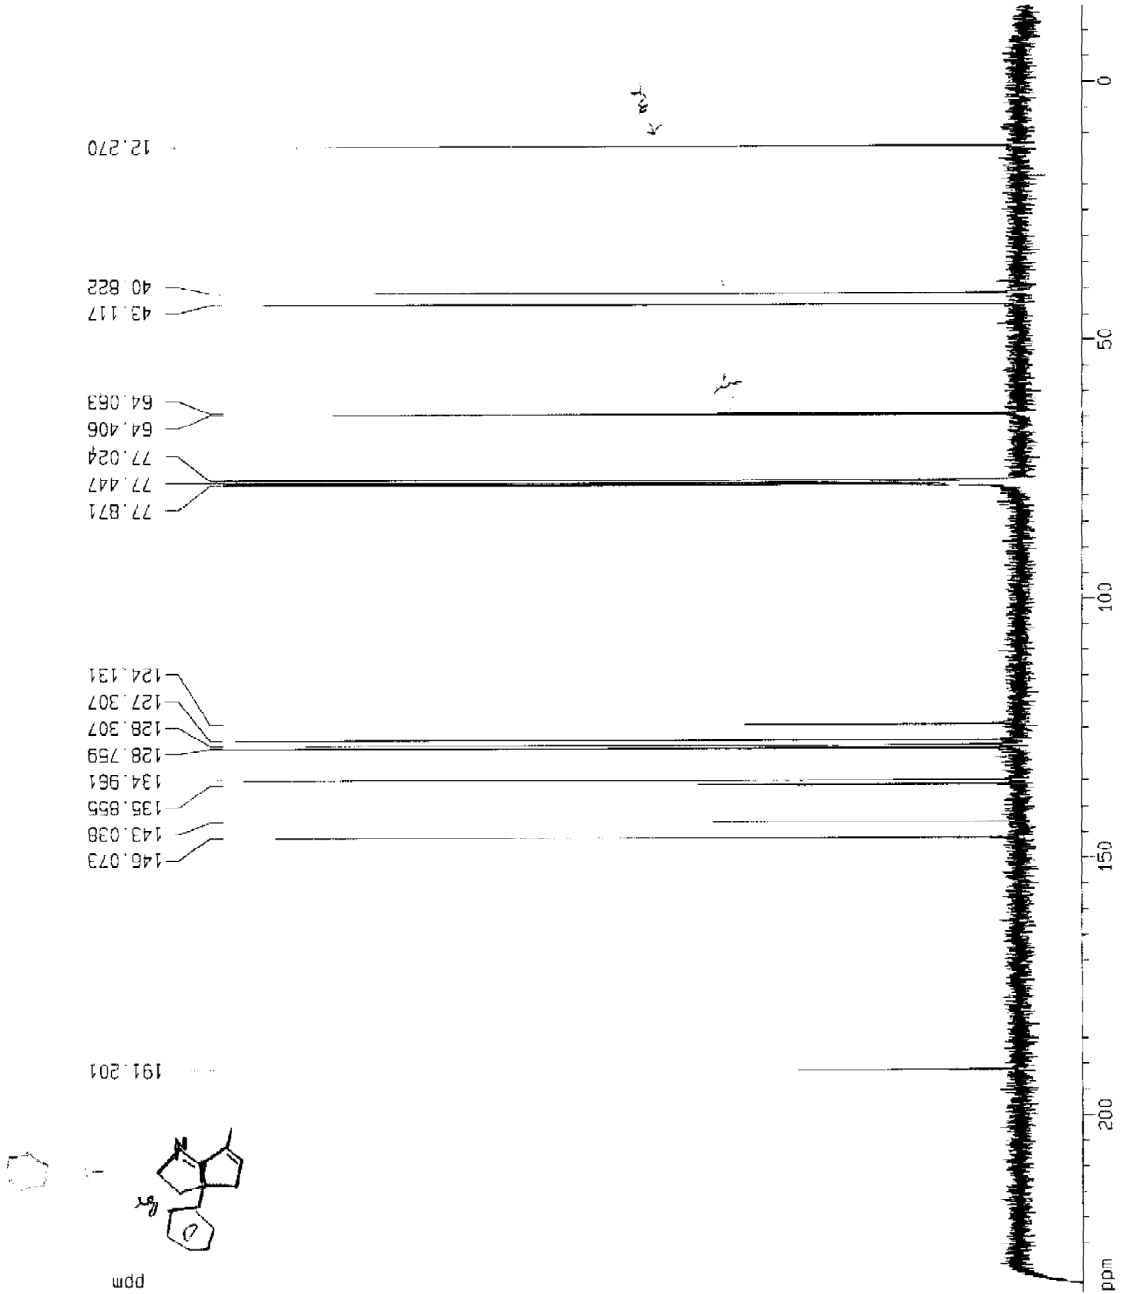

```

Current Data Parameters
NAME      MFI-NDV27-06
EXPNO    1
PROCNO   1

F2 - Acquisition Parameters
Date_    20061127
Time     19:51
INSTRUM  spect
PROBHD   5 mm BBI 1H-B
PULPROG  zg30
TD        65536
SOLVENT  CDCl3
NS        16
DS        2
SWH       8278.146 Hz
FIDRES    0.126324 Hz
AQ        3.9504243 sec
RG         512
DM        60.400 usec
DE        6.00 usec
TE        300.0 K
D1        1.00000000 sec

===== CHANNEL f1 =====
NUC1      1H
P1        6.45 usec
PL1       0.00 dB
SF01      400.1324750 MHz

F2 - Processing parameters
SI        32768
SF        400.1300000 MHz
WDW       rc
SSB       0
LB        0.00 Hz
GB        0
PC        1.00

1D NMR plot parameters
CX        20.00 cm
F1P       10.000 ppm
F1        4001.30 Hz
F2P       -1.000 ppm
F2        -400.13 Hz
PPM0H     0.55000 ppm/cm
HZCM      220.07150 Hz/cm
    
```

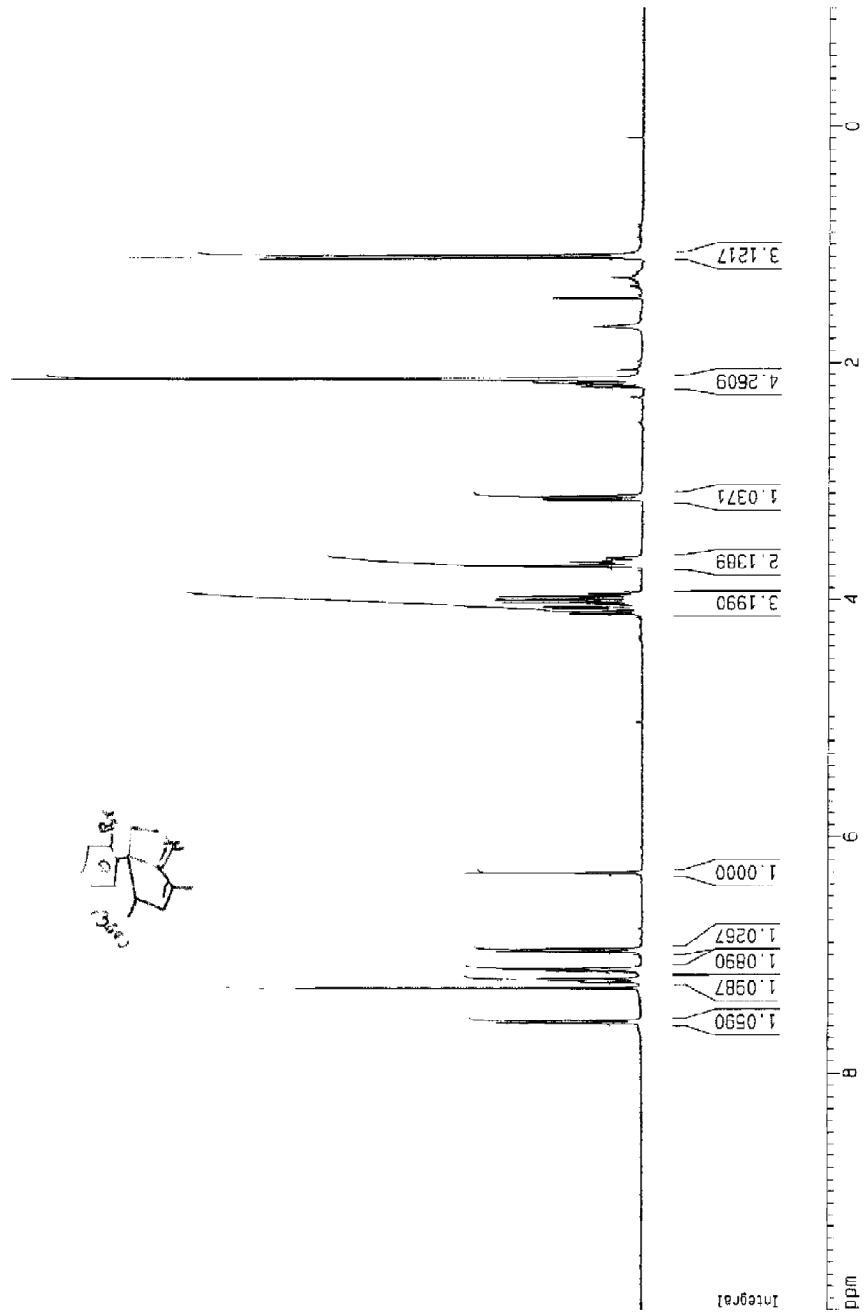

Current Data Parameters  
 NAME MRI-Nov27-05  
 EXPNO 2  
 PROCNO 1

F2 - Acquisition Parameters  
 Date\_ 2005.126  
 Time 8.17  
 INSTRUM spect  
 PULPROG 5 mm Multirho  
 TO 299630  
 SOLVENT DMSO  
 NS 1400  
 DS 4  
 SWH 16832.393 Hz  
 FIDRES 0.287350 Hz  
 AQ 1.7400306 sec  
 RG 13004  
 DM 25.530 usec  
 DE 6.00 usec  
 TE 300.0 K  
 D1 2.0000000 sec  
 D11 0.0300000 sec  
 D12 0.0000000 sec

===== CHANNEL f1 =====  
 NUC1 13C  
 P1 17.90 usec  
 PL1 0.00 dB  
 SFO1 75.4760200 MHz

===== CHANNEL f2 =====  
 CPDPRG2 waltz16  
 NUC2 1H  
 P2 110.00 usec  
 PL2 0.00 dB  
 PL12 17.50 dB  
 PL13 17.50 dB  
 SFO2 300.1312005 MHz

F2 - Processing parameters  
 SI 32768  
 SF 75.467190 MHz  
 MDW EM  
 SSB C  
 LB 1.00 Hz  
 GB C  
 PC 1.46

1D NMR plot parameters  
 CX 20.00 cm  
 FIP 234.765 ppm  
 F1 17717.15 Hz  
 F2 -20.000 ppm  
 F2 -1509.36 Hz  
 DPMCN 12.73824 ppm/cm  
 -ZDM 951.38556 Hz/cm

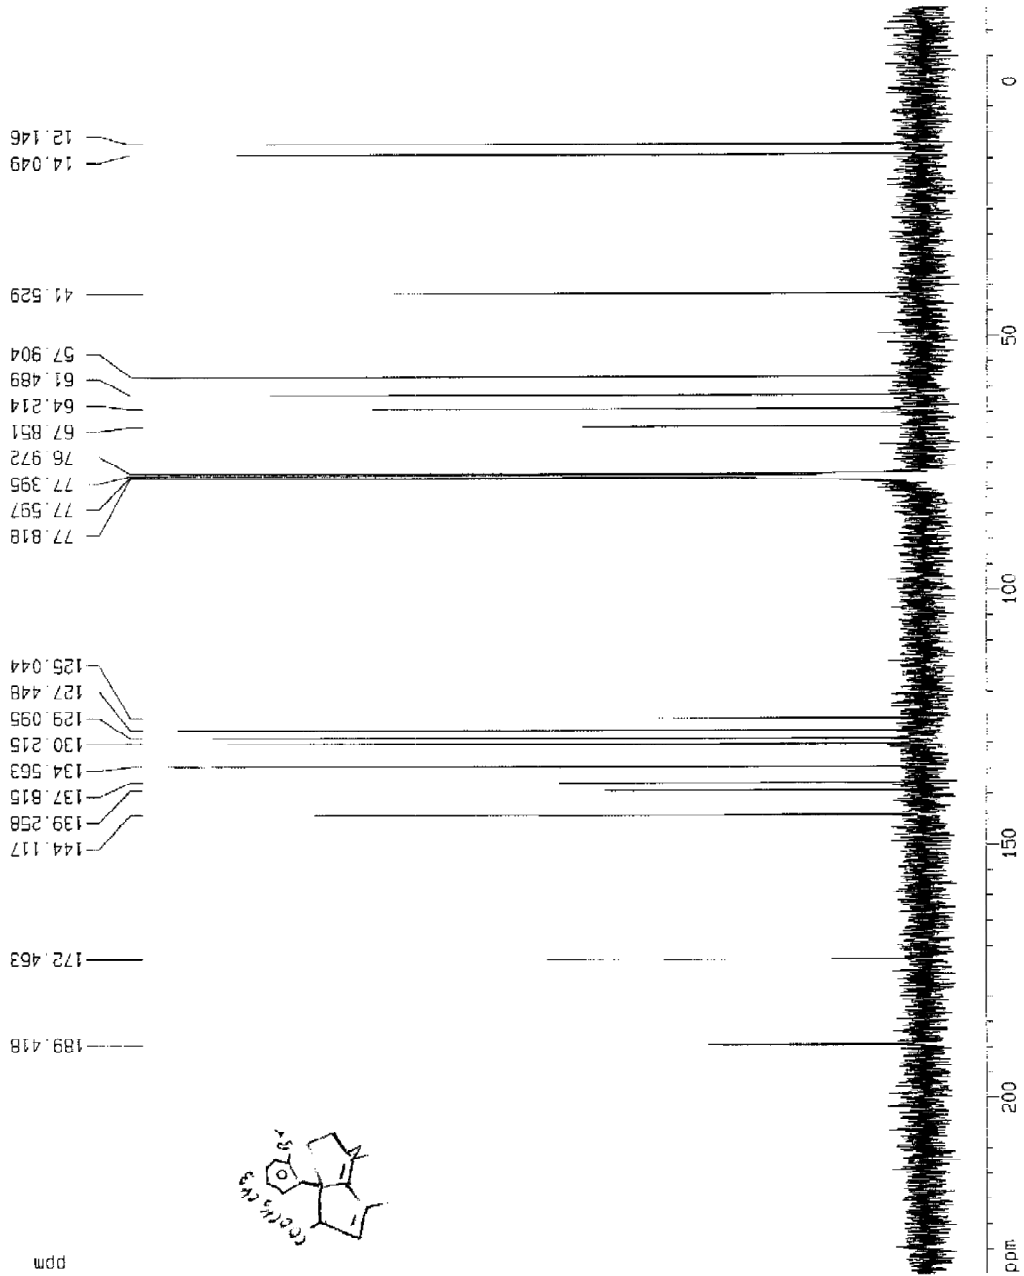

```

Current Data Parameters
NAME      MRI-Nov15-05
EXPNO    4
PROCNO   1

F2 - Acquisition Parameters
Date_    20061115
Time     15.08
INSTRUM spect
PROBHD   5 mm BBI 1H-8
PULPROG zg30
TD       65536
SOLVENT  CDCl3
NS       11
DS       2
SWH      6276.146 Hz
FIDRES   0.126314 Hz
AQ       3.9584243 sec
RG       406.4
DN       60.400 usec
DE       6.00 usec
TE       300.0 K
D1       1.0000000 sec

----- CHANNEL f1 -----
NUC1     1H
P1       6.45 usec
PL1      0.00 dB
SFO1     400.1324710 MHz

F2 - Processing parameters
SI       32768
SF       400.1330000 MHz
MDW      no
SSB      0
LB       0.00 Hz
GB       0
PC       1.00

3D NMR plot parameters
CX       50.00 cm
F1P      10.000 ppm
F1       4001.30 Hz
F2P      -1.000 ppm
F2       -400.13 Hz
PPM0M    0.95000 ppm/cm
HZDM     220.07150 Hz/cm
    
```

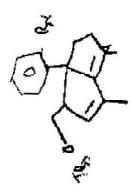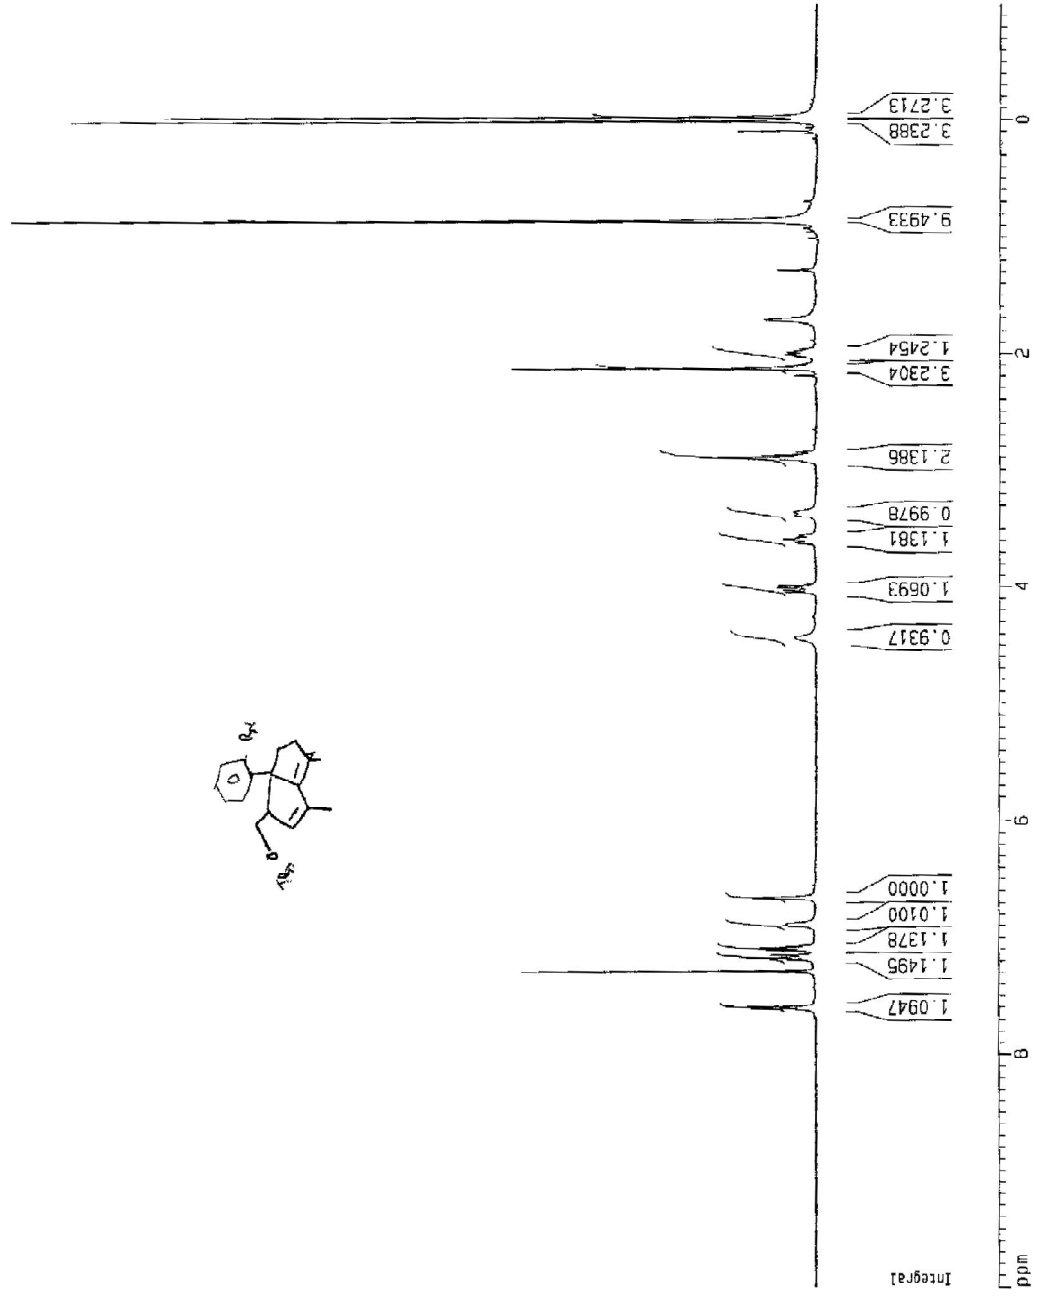



```

Current Data Parameters
NAME      MJI-NOV13-05
EXPNO    2
PROCNO   1

F2 - Acquisition Parameters
Date_    20051119
Time     7.51
INSTRUM spect
PROBHD   5 mm QNP 1H/1
PULPROG zgpg30
TD        65536
SOLVENT  DMS-D3
NS        5000
DS        4
SWH       13196.392 Hz
FIDRES    0.286819 Hz
AQ        1.1433076 sec
RG         324
DM        25.500 usec
DE        6.00 usec
TE        300.0 K
D1        2.0000000 sec
D11       0.3000000 sec
D12       0.0002000 sec

***** CHANNEL f1 *****
NUC1      13C
P1        5.40 usec
PL1       -6.00 dB
SFO1      75.4106357 MHz

***** CHANNEL f2 *****
CPDPRG2  waltz16
NUC2      1H
PCPD2     115.00 usec
PL2       0.00 dB
PL12      20.00 dB
PL13      20.00 dB
SFO2      299.8711992 MHz

F2 - Processing parameters
SI        32768
SF        75.4023410 MHz
WDW       EM
SSB       0
LB        1.00 Hz
GB        0
PC        1.40

1D NMR plot parameters
CX        20.00 cm
FAP       234.651 ppm
F1        17695.24 Hz
FAP       -20.000 ppm
F2        -1506.05 Hz
PAMCM     12.73255 ppm/cm
RZDY      960.05445 p2/cm
    
```

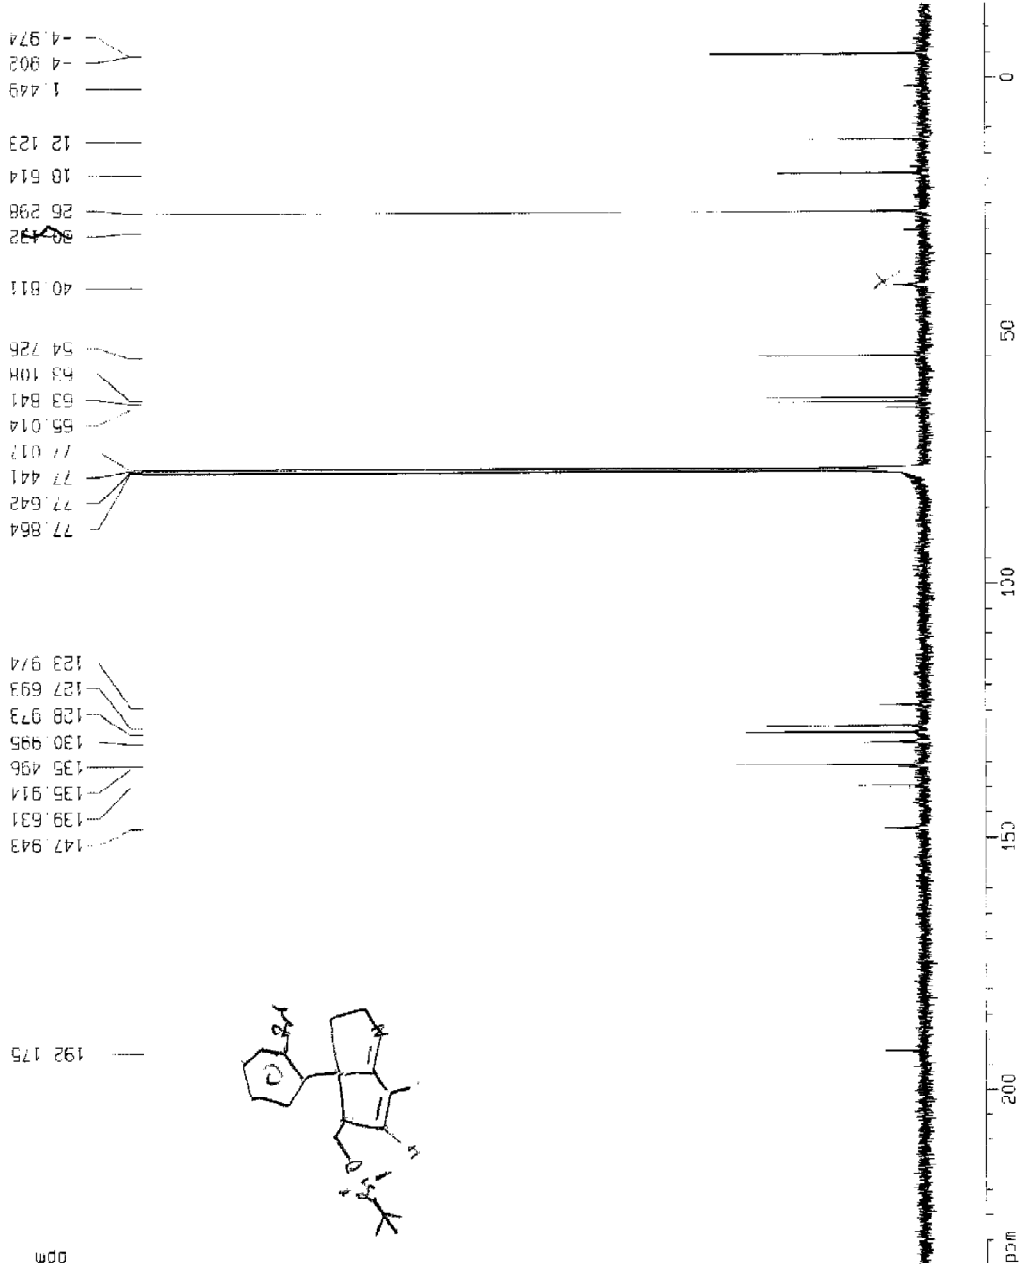

## X-Ray structural Determination of **23d**

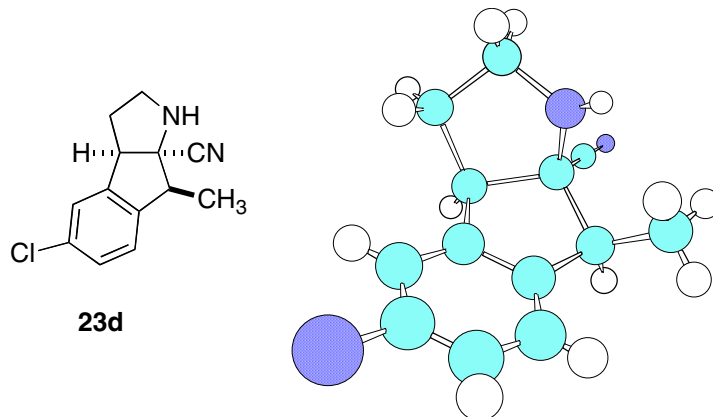

A clear plate shaped crystal of **23d** (C<sub>13</sub> H<sub>13</sub> Cl N<sub>2</sub>) with approximate dimensions 0.1 x 0.17 x 0.25 mm, was used for the X-ray crystallographic analysis. The X-ray intensity data were measured at 98(2) K, cooled by Rigaku-MSX X-Stream 2000, on a Bruker SMART APEX CCD area detector system equipped with a graphite monochromator and a MoK $\alpha$  fine-focus sealed tube ( $\lambda = 0.71073\text{\AA}$ ) operated at 1600 watts power (50 kV, 32 mA). The detector was placed at a distance of 5.8 cm from the crystal.

A total of 1850 frames were collected with a scan width of 0.3° in  $\omega$  and an exposure time of 5 seconds/frame. The total data collection time was about 4 hours. The frames were integrated with the Bruker SAINT software package using a narrow-frame integration algorithm. The integration of the data using a Monoclinic unit cell yielded a total of 7319 reflections to a maximum  $\theta$  angle of 28.29° (0.90  $\approx$  resolution), of which 2783 were independent, completeness = 95.5 %,  $R_{\text{int}} = 0.0290$ ,  $R_{\text{sig}} = 0.0322$  and 2483 were greater than  $2\sigma(I)$ . The final cell constants:  $a = 9.6258(16)\text{\AA}$ ,  $b = 7.7123(13)\text{\AA}$ ,  $c = 16.200(3)\text{\AA}$ ,  $\alpha = 90^\circ$ ,  $\beta = 103.750(3)^\circ$ ,  $\gamma = 90^\circ$ , volume =  $1168.2(3)\text{\AA}^3$ , are based upon the refinement of the XYZ-centroids of 4472 reflections above  $20\sigma(I)$  with  $2.588^\circ < \theta < 28.289^\circ$ . Analysis of the data showed negligible decay during data collection. Data were corrected for absorption effects using the multiscan technique (SADABS). The ratio of minimum to maximum apparent transmission was 0.927354.

The structure was solved and refined using the Bruker SHELXTL (Version 6.1) Software Package, using the space group P2(1)/c, with Z = 4 for the formula unit, C13 H13 Cl N2. The final anisotropic full-matrix least-squares refinement on F<sup>2</sup> with 146 variables converged at R1 = 5.03 %, for the observed data and wR2 = 12.77 % for all data. The goodness-of-fit was 1.079. The largest peak on the final difference map was 0.690 e<sup>-</sup>/Å<sup>3</sup> and the largest hole was -0.677 e<sup>-</sup>/Å<sup>3</sup>. Based on the final model, the calculated density of the crystal is 1.323 g/cm<sup>3</sup> and F(000) amounts to 488 electrons.

### X-Ray Structural Determination of **39a**.

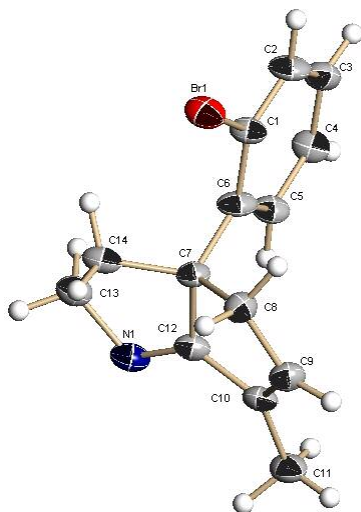

A colorless block shaped crystal of **39a** (C<sub>14</sub>H<sub>14</sub>BrN) with approximate dimensions 0.08 x 0.09 x 0.15 mm, was used for the X-ray crystallographic analysis. The X-ray intensity data were measured at 133(2) K, cooled by Rigaku-MSX-Stream 2000, on a Bruker SMART APEX CCD area detector system equipped with a graphite monochromator and a MoK $\alpha$  fine-focus sealed tube ( $\lambda = 0.71073\text{\AA}$ ) operated at 1600 watts power (50 kV, 32 mA). The detector was placed at a distance of 5.8 cm from the crystal.

A total of 1850 frames were collected with a scan width of  $0.3^\circ$  in  $\omega$  and an exposure time of 10 seconds/frame. The total data collection time was about 8 hours. The frames were integrated with the Bruker SAINT software package using a narrow-frame integration algorithm. The integration of the data using a Triclinic unit cell yielded a total of 4946 reflections to a maximum  $\theta$  angle of  $28.47^\circ$  ( $0.90 \text{ \AA}$  resolution), of which 3003 were independent, completeness = 96 %,  $R_{\text{int}} = 0.0591$ ,  $R_{\text{sig}} = 0.1088$  and 1766 were greater than  $2\sigma(I)$ . The final cell constants:  $a = 7.433(8)\text{\AA}$ ,  $b = 7.991(8)\text{\AA}$ ,  $c = 10.455(11)\text{\AA}$ ,  $\alpha = 85.140(17)^\circ$ ,  $\beta = 79.187(19)^\circ$ ,  $\gamma = 78.799(17)^\circ$ , volume =  $597.6(11)\text{\AA}^3$ , are based upon the refinement of the XYZ-centroids of 2783 reflections above  $20\sigma(I)$  with  $2.843^\circ < \theta < 28.24^\circ$ . Analysis of the data showed negligible decay during data collection. Data were corrected for absorption effects using the multiscan technique (SADABS). The ratio of minimum to maximum apparent transmission was 0.0426.

The structure was solved and refined using the Bruker SHELXTL (Version 6.1) Software Package, using the space group P-1, with  $Z = 2$  for the formula unit,  $\text{C}_{14}\text{H}_{14}\text{BrN}$ . The final anisotropic full-matrix least-squares refinement on  $F^2$  with 146 variables converged at  $R1 = 6.93 \%$ , for the observed data and  $wR2 = 20.91 \%$  for all data. The goodness-of-fit was 0.987. The largest peak on the final difference map was  $1.453 \text{ e}^-/\text{\AA}^3$  and the largest hole was  $-1.009 \text{ e}^-/\text{\AA}^3$ . Based on the final model, the calculated density of the crystal is  $1.535 \text{ g/cm}^3$  and  $F(000)$  amounts to 280 electrons.
